# Supplementary material
Source: Research Square preprint supplement (doi:10.21203/rs.3.rs-10032043/v1)
Supplement: Supplementary file 1 [file ac5bfb8e659f2a1095f4416e.docx]

# **Supplementary appendix to “Global burden structure of chronic kidney disease due to type 2 diabetes: a SHAP-based spatiotemporal model-attribution analysis across 203 countries and territories”.**

This appendix provides further methodological detail and supplemental results.

# Supplementary Methods

## Supplementary Text 1. Rationale for the age cutoff at 45 years

We limited analyses to adults aged 45 years or older based on epidemiological burden, methodological rigor, and policy relevance. CKD prevalence rises steeply after mid-life approximately 6% among those aged 18-44 years, 12% at 45-64 years, and 34% at ≥65 years, indicating that the majority of CKD burden occurs after age 45[1]. Although the mean age at diagnosis of type 2 diabetes has declined to around 46 years[2], diabetic kidney disease typically manifests nearly a decade after onset (8.73±3.37 years in a Malaysian single-centre cohort study) [3],so individuals younger than 45 years generally have insufficient cumulative hyperglycaemic exposure for CKD to be attributable to T2DM at the population level. Including younger adults would dilute effect estimates toward the null and bias the overall burden downward, while also increasing the risk of misclassification from type 1 diabetes, latent autoimmune diabetes in adults (LADA), or maturity-onset diabetes of the young (MODY) [4]. In addition, not only the Global Burden of Disease (GBD) study but also other primary databases, such as the US National Health and Nutrition Examination Survey (NHANES), often use age strata starting at 18-44, 45-64, and ≥65 years, enhancing cross-national and temporal comparability[5]. Using a ≥45-year threshold therefore improves internal validity, interpretability, and policy relevance by focusing on the age groups carrying most of the CKD burden.

## Supplementary Text 2. Robustness analysis of RDSR to CKD–DM2 effects

To assess the stability of the RDSR derived from a tree-based model (XGBoost) with TreeSHAP, we constructed five scaling scenarios relative to the Raw Data: A/10, (A,B)/10, C/10, (A,C)/10, and (A,B,C)/10. Here, A denotes the predictor set for DM2, B denotes the predictor set for CKD-nDM and C is the target CKD-DM2 DALYs. Using hierarchical-cluster units (HC_Cluster) as analysis strata, we computed cluster-level aggregates of |SHAP|_A, |SHAP|_B, and RDSR (table fields Mean_SHAP_A, Mean_SHAP_B, and Mean_SHAP_Diff_Ratio), and evaluated robustness by taking cluster-wise ratios to Raw. Results are summarized in Supplementary Table 2.

Under feature-only scaling (A/10 and (A,B)/10), the ratios for |SHAP|_A, |SHAP|_B, and RDSR are uniformly 1.000 across all clusters, indicating complete insensitivity to linear rescaling of inputs. Under target scaling (C/10 and its combinations), cluster-wise ratios for |SHAP|_A and |SHAP|_B lie approximately within 0.096–0.112, and RDSR ratios within 0.809–1.020, consistent with near-proportional shrinkage of outputs accompanied by minor fluctuations. Mechanistically, linear rescaling of features preserves sample ordering and thus tree splits and leaf memberships, leaving leaf values unchanged; by contrast, rescaling the target alters gradient and gain magnitudes, proportionally shrinking leaf weights and potentially adjusting borderline splits, which yields small deviations of RDSR from unity[6, 7]. Overall, the relative ordering of clusters remains stable, supporting good robustness of RDSR under different scale settings.

## Supplementary References

[1] National Institute of Diabetes and Digestive and Kidney Diseases. Kidney Disease Statistics for the United States [Internet]. U.S. Department of Health and Human Services; 2023. Available from: <https://www.niddk.nih.gov/health-information/health-statistics/kidney-disease>.

[2] Koopman RJ, Mainous AGr, Diaz VA, Geesey ME. Changes in age at diagnosis of type 2 diabetes mellitus in the United States, 1988 to 2000. Annals of Family Medicine. 2005;3(1):60-3.

[3] Ng YP, Ahmed R, Ooi GS, Lau CY, Balasubramanian GP, Yap CH. The rate of progression of type 2 diabetes mellitus to end stage renal disease - A single centred retrospective study from Malaysia. Diabetes & Metabolic Syndrome: Clinical Research & Reviews. 2018;12(6):1025-30.

[4] Strati M, Moustaki M, Psaltopoulou T, Vryonidou A, Paschou SA. Early onset type 2 diabetes mellitus: an update. Endocrine. 2024;85(3):965-78.

[5] Centers for Disease Control and Prevention. Chronic Kidney Disease in the United States. Atlanta, GA: US Department of Health and Human Services, CDC; 2023.

[6] Chen T, Guestrin C. XGBoost: A Scalable Tree Boosting System. Proceedings of the 22nd ACM SIGKDD International Conference on Knowledge Discovery and Data Mining (KDD 2016); San Francisco, CA: Association for Computing Machinery (ACM); 2016. p. 785-94.

[7] Lundberg SM, Lee S-I. A Unified Approach to Interpreting Model Predictions. Advances in Neural Information Processing Systems 30 (NIPS 2017); 2017; Long Beach, California: Curran Associates, Inc.

# Supplementary Box

**Supplementary Box 1. Study questions and prespecified success criteria (Q1-Q4)**

**Q1. Within-year predictive accuracy**

**Study question:** Can the XGBoost model accurately predict age-standardised CKD-T2DM DALYs across countries/territories within each calendar year using decomposed T2DM and CKD-nDM burden indicators (e.g., YLLs and YLDs)?
**Design/assessment:** For each year (1990-2021), implement year-wise 5-fold cross-validation across that year’s country/territory observations. Compute R², MAE, and RMSE for each fold and summarise performance at the year level .
**Success criteria:** Performance is considered acceptable if (i) the median year-level R² across years is ≥ 0.70, and (ii) there is no year with material degradation, operationalised as minimum annual R² ≥ 0.65. Report year-wise MAE and RMSE alongside R² to contextualise error magnitude on the DALY scale.

**Q2. Robustness and generalizability to unseen calendar years**
**Study question:** Does the model exhibit adequate robustness and data generalizability when applied to unseen calendar years, beyond random within-year cross-validation folds?
**Design/assessment:** Temporal generalizability was evaluated by training a single XGBoost model on all country/territory observations from 2021 and then applying this fixed model, without retraining, to each earlier calendar year from 2010 to 2020. For each year, predictions of age-standardised CKD–T2DM DALYs were generated from the corresponding year-specific covariates (decomposed T2DM and CKD-nDM burden indicators such as YLLs and YLDs), and model performance was quantified using the coefficient of determination (R²), mean absolute error (MAE), and root mean squared error (RMSE) across countries/territories. Validation results across 2010–2020 were summarised as the median and range of each metric to characterise performance stability over time.

**Success criteria:** Temporal generalizability was considered acceptable if both of the following conditions were met: (i) the median R² across the held-out years 2010–2020 remained ≥ 0.60; and (ii) the median MAE and RMSE increased by no more than 10–15% relative to the corresponding metrics obtained under the standard within-year 5-fold cross-validation framework described for the primary evaluation.

**Q3. Stability of driver attribution**
**Study question:** Are the main drivers of CKD–T2DM DALYs, as quantified through SHAP-based variance decomposition, stable and interpretable across recent years and settings?
**Design/assessment:** Stability of driver attribution was assessed using SHAP values and LMG-based variance decomposition derived from the XGBoost model. For each of the last five calendar years of the study period (2017–2021), global importance measures for each feature (LMG contributions) were computed and used to obtain year-specific rankings of drivers. Temporal stability of importance rankings was evaluated by comparing the rankings for each year from 2017 to 2020 with those for 2021, using Spearman rank correlation. Directional stability was assessed by examining, for each feature and country, whether the sign of the SHAP values in years 2017–2020 agreed with that in 2021, and by computing the proportion of country–year observations with concordant signs, summarised overall and by region.
**Success criteria:** Driver attribution was considered acceptably stable if: (i) feature-importance rankings based on SHAP values and LMG variance decomposition showed high concordance between each of 2017–2020 and 2021, with Spearman rank correlation ≥ 0.80; and (ii) for each feature, the direction of association (sign of SHAP values) was concordant with that in 2021 in at least 80% of country–year observations within 2017–2020, supporting cross-country and temporal comparability of the recent driver structure.

**Q4. Cluster-specific interactions and trend projections**
**Study question:** Do countries form distinct SHAP-based driver clusters with different statistical interaction patterns between T2DM-related and CKD-nDM-related drivers, and are long-term trajectories of the relative driver structure ratio (RDSR) credibly characterised by the INLA projection model?

**Design/assessment:** Countries/territories were grouped into SHAP-based clusters according to similarities in their recent CKD–T2DM driver structures. Within each cluster, regression models including interaction terms between T2DM-related and CKD-nDM-related drivers were fitted, and the statistical significance of these interaction terms was evaluated using p-values. Long-term trajectories of the relative driver structure ratio (RDSR) were modelled using Bayesian INLA time-series models at both the global level and the level of each SHAP-defined cluster, with calendar year as the time index and uncertainty summarised by posterior credible intervals. Model fit for the INLA projections was evaluated by examining the distribution of standardised residuals using Kolmogorov–Smirnov tests, residual histograms, and Q–Q plots.

**Success criteria:** SHAP-based interaction terms within clusters show consistent direction and statistical support (p < 0.05 for key interaction terms). All reported interactions are explicitly interpreted as SHAP-based statistical/model interactions rather than causal effects. INLA projections are required to show adequate model fit, defined as Kolmogorov–Smirnov D statistics for standardized residuals below about 0.35 for the global and cluster-specific models, with residual histograms approximately symmetric and Q–Q plots showing no major deviations from the 45° reference line.

**Implementation note:** Detailed train-validation design, tuning strategy/search space, and final hyperparameter settings for the 2021 main model are provided in **Supplementary Table 3**.

**Supplementary Table**

Supplementary Table 1. XGBoost train-validation design, tuning strategy, and final hyperparameters (1990–2021; 203 countries/territories)

| **Block** | **Item** | **Specification** |
| --- | --- | --- |
| **A. Train–validation design** | Data unit | Country–year (1990–2021); outcome = age-standardised CKD–T2DM DALYs (≥45 years). |
| Predictors used in XGBoost | Decomposed indicators from selected T2DM and CKD–nDM burden features (e.g., YLLs, YLDs). |
| Primary CV scheme | Year-wise 5-fold cross-validation (performed separately within each year’s set of countries/territories). |
| Metrics reported | R², MAE, RMSE (summarised as the median [range] of year-wise 5-fold validation metrics across years and/or across CV rounds). |
| Temporal Robustness | Model trained on data from 2021 only and validated on earlier calendar years (2016–2020; all countries / territories), treating these years as out-of-sample temporal extrapolation. |
| Residual diagnostics | Standardised residual plots (residual vs fitted; Q–Q) and distribution checks; report summary (e.g., no major trend / bias). |
| Tuning method | Random search (RandomizedSearchCV with 5-fold CV on training data only). |
| **B. Tuning approach & search space** | Selection criterion | Best mean validation R² (maximised). |
| Early stopping | No. |
| Candidate hyperparameter ranges | learning_rate (eta): 0.01–0.30;  max_depth: 3–9;  subsample: 0.60–1.00;  colsample_bytree: 0.60–1.00;  n_estimators / nrounds: 100–500. |
| Fixed settings | objective = reg:squarederror;  eval_metric = rmse;  random_seed = 42;  tree_method = “auto”. |
| **C. Final hyperparameters (2021 main model)** | learning_rate (eta) | 0.02424 |
| max_depth | 7 |
| Subsample | 0.7127 |
| colsample_bytree | 0.8732 |
| n_estimators / nrounds | 314 |

To evaluate the transferability of the model to other, previously unseen data structures, we trained the model using data from 2021 and validated it on data from other calendar years. Interaction analyses in this study refer to SHAP-based statistical/model interactions and do not imply causal relationships. DALYs = disability-adjusted life years; YLLs = years of life lost; YLDs = years lived with disability; CV = cross-validation; MAE = mean absolute error; RMSE = root mean squared error.

**Supplementary Table 2. Robustness of Relative driver structure ratio across scaling scenarios**

|  | **HC_Cluster** | **Mean_SHAP_A** | **Mean_SHAP_B** | **Mean_SHAP_Diff_Ratio** | **Count** |
| --- | --- | --- | --- | --- | --- |
|  | 1 | 261.59 | 158.21 | 0.22 | 71 |
|  | 2 | 449.28 | 105.95 | 0.62 | 63 |
| Raw Data | 3 | 1404.17 | 648.62 | 0.38 | 9 |
| 4 | 394.61 | 184.14 | 0.30 | 60 |
| Global | 409.81 | 171.40 | 0.38 | 203 |
| 1 | 261.59 | 158.21 | 0.22 | 71 |
| 2 | 449.28 | 105.95 | 0.62 | 63 |
| (A,B) / 10 | 3 | 1404.17 | 648.62 | 0.38 | 9 |
| 4 | 394.61 | 184.14 | 0.30 | 60 |
| Global | 409.81 | 171.40 | 0.38 | 203 |
| 1 | 261.59 | 158.21 | 0.22 | 71 |
| 2 | 449.28 | 105.95 | 0.62 | 63 |
| A / 10 | 3 | 1404.17 | 648.62 | 0.38 | 9 |
| 4 | 394.61 | 184.14 | 0.30 | 60 |
| Global | 409.81 | 171.40 | 0.38 | 203 |
| 1 | 25.49 | 16.97 | 0.18 | 71 |
| 2 | 44.76 | 10.30 | 0.63 | 63 |
| (A,B,C) / 10 | 3 | 134.41 | 72.70 | 0.31 | 9 |
| 4 | 39.08 | 18.33 | 0.30 | 60 |
| Global | 40.32 | 17.78 | 0.36 | 203 |
| 1 | 25.49 | 16.97 | 0.18 | 71 |
| 2 | 44.76 | 10.30 | 0.63 | 63 |
| 3 | 134.41 | 72.70 | 0.31 | 9 |
| C / 10 | 4 | 39.08 | 18.33 | 0.30 | 60 |
| Global | 40.32 | 17.78 | 0.36 | 203 |
| 1 | 25.49 | 16.97 | 0.18 | 71 |
| 2 | 44.76 | 10.30 | 0.63 | 63 |
| (A,C) / 10 | 3 | 134.41 | 72.70 | 0.31 | 9 |
| 4 | 39.08 | 18.33 | 0.30 | 60 |
| Global | 40.32 | 17.78 | 0.36 | 203 |

This table presents the robustness of Relative driver structure ratio across different scaling scenarios: A/10, (A,B)/10, C/10, (A,C)/10, and (A,B,C)/10, where A represents the DM2 predictor set, B the CKD-nDM predictor set, and C the target CKD-DM2 DALYs.

**Supplementary Table 3. Model validation and temporal robustness metrics**

| **Evaluation framework** | **Year** | **R²** | **MAE** | **RMSE** | **Relative change vs Q1** | **Interpretation** |
| --- | --- | --- | --- | --- | --- | --- |
| Q2 summary vs Q1 | R2 | 0.773 | 0.86 | 0.85 | NA | Q1 median, Q2 median/min/max and relative change |
| Q2 summary vs Q1 | MAE | N/A | N/A | 94.11 | -21.02484825 | Q1 median, Q2 median/min/max and relative change |
| Q2 summary vs Q1 | RMSE | N/A | N/A | N/A | -12.48185011 | Q1 median, Q2 median/min/max and relative change |
| Q1 within-year five-fold cross-validation | 1990 | 0.741 | N/A | N/A | N/A | Year-wise country-level CV |
| Q1 within-year five-fold cross-validation | 1991 | 0.757 | N/A | N/A | N/A | Year-wise country-level CV |
| Q1 within-year five-fold cross-validation | 1992 | 0.762 | N/A | N/A | N/A | Year-wise country-level CV |
| Q1 within-year five-fold cross-validation | 1993 | 0.784 | N/A | N/A | N/A | Year-wise country-level CV |
| Q1 within-year five-fold cross-validation | 1994 | 0.775 | N/A | N/A | N/A | Year-wise country-level CV |
| Q1 within-year five-fold cross-validation | 1995 | 0.762 | N/A | N/A | N/A | Year-wise country-level CV |
| Q1 within-year five-fold cross-validation | 1996 | 0.755 | N/A | N/A | N/A | Year-wise country-level CV |
| Q1 within-year five-fold cross-validation | 1997 | 0.755 | N/A | N/A | N/A | Year-wise country-level CV |
| Q1 within-year five-fold cross-validation | 1998 | 0.776 | N/A | N/A | N/A | Year-wise country-level CV |
| Q1 within-year five-fold cross-validation | 1999 | 0.786 | N/A | N/A | N/A | Year-wise country-level CV |
| Q1 within-year five-fold cross-validation | 2000 | 0.789 | N/A | N/A | N/A | Year-wise country-level CV |
| Q1 within-year five-fold cross-validation | 2001 | 0.791 | N/A | N/A | N/A | Year-wise country-level CV |
| Q1 within-year five-fold cross-validation | 2002 | 0.781 | N/A | N/A | N/A | Year-wise country-level CV |
| Q1 within-year five-fold cross-validation | 2003 | 0.776 | N/A | N/A | N/A | Year-wise country-level CV |
| Q1 within-year five-fold cross-validation | 2004 | 0.775 | N/A | N/A | N/A | Year-wise country-level CV |
| Q1 within-year five-fold cross-validation | 2005 | 0.784 | N/A | N/A | N/A | Year-wise country-level CV |
| Q1 within-year five-fold cross-validation | 2006 | 0.798 | N/A | N/A | N/A | Year-wise country-level CV |
| Q1 within-year five-fold cross-validation | 2007 | 0.802 | N/A | N/A | N/A | Year-wise country-level CV |
| Q1 within-year five-fold cross-validation | 2008 | 0.787 | N/A | N/A | N/A | Year-wise country-level CV |
| Q1 within-year five-fold cross-validation | 2009 | 0.775 | N/A | N/A | N/A | Year-wise country-level CV |
| Q1 within-year five-fold cross-validation | 2010 | 0.788 | N/A | N/A | N/A | Year-wise country-level CV |
| Q1 within-year five-fold cross-validation | 2011 | 0.778 | N/A | N/A | N/A | Year-wise country-level CV |
| Q1 within-year five-fold cross-validation | 2012 | 0.768 | N/A | N/A | N/A | Year-wise country-level CV |
| Q1 within-year five-fold cross-validation | 2013 | 0.772 | N/A | N/A | N/A | Year-wise country-level CV |
| Q1 within-year five-fold cross-validation | 2014 | 0.744 | N/A | N/A | N/A | Year-wise country-level CV |
| Q1 within-year five-fold cross-validation | 2015 | 0.725 | N/A | N/A | N/A | Year-wise country-level CV |
| Q1 within-year five-fold cross-validation | 2016 | 0.730 | N/A | N/A | N/A | Year-wise country-level CV |
| Q1 within-year five-fold cross-validation | 2017 | 0.729 | N/A | N/A | N/A | Year-wise country-level CV |
| Q1 within-year five-fold cross-validation | 2018 | 0.741 | N/A | N/A | N/A | Year-wise country-level CV |
| Q1 within-year five-fold cross-validation | 2019 | 0.748 | N/A | N/A | N/A | Year-wise country-level CV |
| Q1 within-year five-fold cross-validation | 2020 | 0.753 | N/A | N/A | N/A | Year-wise country-level CV |
| Q1 within-year five-fold cross-validation | 2021 | 0.757 | N/A | N/A | N/A | Year-wise country-level CV |
| Q2 temporal validation: 2021-trained model | 2010 | 0.853 | N/A | N/A | N/A | Out-of-year validation |
| Q2 temporal validation: 2021-trained model | 2011 | 0.850 | N/A | N/A | N/A | Out-of-year validation |
| Q2 temporal validation: 2021-trained model | 2012 | 0.854 | N/A | N/A | N/A | Out-of-year validation |
| Q2 temporal validation: 2021-trained model | 2013 | 0.852 | N/A | N/A | N/A | Out-of-year validation |
| Q2 temporal validation: 2021-trained model | 2014 | 0.858 | N/A | N/A | N/A | Out-of-year validation |
| Q2 temporal validation: 2021-trained model | 2015 | 0.861 | N/A | N/A | N/A | Out-of-year validation |
| Q2 temporal validation: 2021-trained model | 2016 | 0.863 | N/A | N/A | N/A | Out-of-year validation |
| Q2 temporal validation: 2021-trained model | 2017 | 0.883 | N/A | N/A | N/A | Out-of-year validation |
| Q2 temporal validation: 2021-trained model | 2018 | 0.898 | N/A | N/A | N/A | Out-of-year validation |
| Q2 temporal validation: 2021-trained model | 2019 | 0.909 | N/A | N/A | N/A | Out-of-year validation |
| Q2 temporal validation: 2021-trained model | 2020 | 0.932 | 94.11 | N/A | N/A | Out-of-year validation |

Q1 denotes year-wise five-fold cross-validation; Q2 denotes temporal validation using the 2021-trained model applied to 2010–2020 without retraining

**Supplementary Table 4. SHAP feature-attribution stability across years**

| **Year** | **Spearman rank correlation vs 2021** | **CKD–nDM YLDs sign concordance (%)** | **CKD–nDM YLLs sign concordance (%)** | **T2DM YLDs sign concordance (%)** | **T2DM YLLs sign concordance (%)** | **Minimum sign concordance (%)** | **Median sign concordance (%)** | **Top-ranked feature** | **Stability interpretation** |
| --- | --- | --- | --- | --- | --- | --- | --- | --- | --- |
| 2017 | 1.000 | 92.6 | 85.2 | 96.6 | 96.1 | 85.2 | 94.3 | YLLs_Dm2 | Meets prespecified stability criterion |
| 2018 | 0.800 | 92.1 | 84.2 | 95.1 | 93.6 | 84.2 | 92.9 | YLDs_Dm2 | Meets prespecified stability criterion |
| 2019 | 1.000 | 94.6 | 89.7 | 97.5 | 98.0 | 89.7 | 96.1 | YLLs_Dm2 | Meets prespecified stability criterion |
| 2020 | 1.000 | 95.1 | 96.1 | 98.0 | 96.6 | 95.1 | 96.3 | YLLs_Dm2 | Meets prespecified stability criterion |

Feature-attribution stability was evaluated using 2017–2020 rankings and SHAP sign concordance compared with 2021.

**Supplementary Table 5. Cluster-specific interaction-regression outputs**

| **Cluster** | **Model feature block** | **Interaction term** | **T2DM-related feature** | **CKD–nDM-related feature** | **Std. error** | **Test statistic** | **P value** | **Significance** | **Direction** |
| --- | --- | --- | --- | --- | --- | --- | --- | --- | --- |
| Cluster 1 | DM2_YLLs | SHAP_YLLs_DM2:SHAP_YLLs_CKD_nDM | YLLs | YLLs | 0.0012 | -3.5913 | 0.0006 | *** | Negative |
| Cluster 1 | DM2_YLLs | SHAP_YLLs_DM2:SHAP_YLDs_CKD_nDM | YLLs | YLDs | 0.0018 | -1.7632 | 0.0824 |  | Negative |
| Cluster 1 | DM2_YLDs | SHAP_YLDs_DM2:SHAP_YLLs_CKD_nDM | YLDs | YLLs | 0.0016 | -3.4506 | 0.0010 | *** | Negative |
| Cluster 1 | DM2_YLDs | SHAP_YLDs_DM2:SHAP_YLDs_CKD_nDM | YLDs | YLDs | 0.0022 | -0.6955 | 0.4891 |  | Negative |
| Cluster 2 | DM2_YLLs | SHAP_YLLs_DM2:SHAP_YLLs_CKD_nDM | YLLs | YLLs | 0.0041 | -0.8658 | 0.3901 |  | Negative |
| Cluster 2 | DM2_YLLs | SHAP_YLLs_DM2:SHAP_YLDs_CKD_nDM | YLLs | YLDs | 0.0015 | 0.1054 | 0.9164 |  | Positive |
| Cluster 2 | DM2_YLDs | SHAP_YLDs_DM2:SHAP_YLLs_CKD_nDM | YLDs | YLLs | 0.0095 | 0.5081 | 0.6133 |  | Positive |
| Cluster 2 | DM2_YLDs | SHAP_YLDs_DM2:SHAP_YLDs_CKD_nDM | YLDs | YLDs | 0.0050 | -0.3178 | 0.7518 |  | Negative |
| Cluster 3 & 4 | DM2_YLLs | SHAP_YLLs_DM2:SHAP_YLLs_CKD_nDM | YLLs | YLLs | 0.0019 | 1.5449 | 0.1272 |  | Positive |
| Cluster 3 & 4 | DM2_YLLs | SHAP_YLLs_DM2:SHAP_YLDs_CKD_nDM | YLLs | YLDs | 0.0007 | -0.7145 | 0.4775 |  | Negative |
| Cluster 3 & 4 | DM2_YLDs | SHAP_YLDs_DM2:SHAP_YLLs_CKD_nDM | YLDs | YLLs | 0.0019 | 3.4649 | 0.0009 | *** | Positive |
| Cluster 3 & 4 | DM2_YLDs | SHAP_YLDs_DM2:SHAP_YLDs_CKD_nDM | YLDs | YLDs | 0.0005 | 4.0702 | 0.0001 | *** | Positive |

**Interaction terms describe within-cluster statistical/model-attribution patterns and should not be interpreted as causal or biological interactions.**

**Supplementary Table 6. Country-Level DALYs, SHAP Values, RDSR and Health Care Cluster Categorization for CKD-T2DM Comorbidity (2021)**

| **location** | **DALYs_CKD_T2DM** | | **DALYs_T2DM** | | **SHAP_YLLs_T2DM** | | **SHAP_YLDs_T2DM** | | **SHAP_T2DM_sum** | | **SHAP_T2DM_abs** | | **DALYs_CKD_nonDM** | | **SHAP_YLLs_CKD_nDM** | | **SHAP_YLDs_CKD_nDM** | | **SHAP_CKDnDM_sum** | | **SHAP_CKDnDM_abs** | **RDSR** | **Cluster** |
| --- | --- | --- | --- | --- | --- | --- | --- | --- | --- | --- | --- | --- | --- | --- | --- | --- | --- | --- | --- | --- | --- | --- | --- |
| Afghanistan | 877.85 | | 6502.56 | | 19.37 | | 236.11 | | 255.48 | | 255.48 | | 3100.53 | | -2.98 | | -53.81 | | -56.79 | | 56.79 | 0.64 | 1 |
| Albania | 113.49 | | 1295.07 | | -349.58 | | -133.08 | | -482.66 | | 482.66 | | 674.76 | | -44.43 | | -43.11 | | -87.55 | | 87.55 | 0.69 | 2 |
| Algeria | 525.26 | | 3624.80 | | -240.16 | | 112.46 | | -127.70 | | 352.62 | | 1678.98 | | 52.85 | | -64.44 | | -11.59 | | 117.29 | 0.50 | 1 |
| American Samoa | 3653.14 | | 13317.73 | | 999.28 | | 922.74 | | 1922.02 | | 1922.02 | | 869.77 | | 200.93 | | 566.81 | | 767.74 | | 767.74 | 0.43 | 3 |
| Andorra | 143.03 | | 1389.58 | | -344.63 | | -152.61 | | -497.24 | | 497.24 | | 556.92 | | -40.56 | | -22.78 | | -63.34 | | 63.34 | 0.77 | 2 |
| Angola | 565.42 | | 5204.04 | | 132.83 | | -125.01 | | 7.81 | | 257.84 | | 2209.83 | | -35.81 | | -102.00 | | -137.82 | | 137.82 | 0.30 | 1 |
| Antigua and Barbuda | 1553.34 | | 7060.29 | | 305.66 | | 415.96 | | 721.63 | | 721.63 | | 1532.67 | | 109.95 | | 19.50 | | 129.45 | | 129.45 | 0.70 | 4 |
| Argentina | 403.11 | | 2493.08 | | -217.93 | | -124.66 | | -342.59 | | 342.59 | | 1330.64 | | 68.98 | | -48.90 | | 20.08 | | 117.89 | 0.49 | 1 |
| Armenia | 206.77 | | 2313.74 | | -286.41 | | -178.92 | | -465.32 | | 465.32 | | 853.31 | | -32.77 | | 29.97 | | -2.80 | | 62.74 | 0.76 | 2 |
| Australia | 75.92 | | 1397.92 | | -340.40 | | -127.28 | | -467.68 | | 467.68 | | 553.21 | | -54.72 | | -70.76 | | -125.49 | | 125.49 | 0.58 | 2 |
| Austria | 196.10 | | 1168.87 | | -331.94 | | -138.92 | | -470.86 | | 470.86 | | 704.00 | | -43.22 | | -20.70 | | -63.92 | | 63.92 | 0.76 | 2 |
| Azerbaijan | 222.34 | | 2639.36 | | -255.08 | | -253.18 | | -508.25 | | 508.25 | | 905.92 | | -51.33 | | 102.15 | | 50.81 | | 153.48 | 0.54 | 2 |
| Bahamas | 1221.95 | | 5345.28 | | 98.50 | | 263.73 | | 362.23 | | 362.23 | | 1271.15 | | 88.99 | | 38.07 | | 127.05 | | 127.05 | 0.48 | 4 |
| Bahrain | 721.99 | | 11701.45 | | 176.58 | | 137.55 | | 314.13 | | 314.13 | | 2400.89 | | -67.05 | | -201.15 | | -268.19 | | 268.19 | 0.08 | 1 |
| Bangladesh | 322.10 | | 3483.47 | | -135.65 | | -133.99 | | -269.63 | | 269.63 | | 666.69 | | -20.89 | | -73.86 | | -94.75 | | 94.75 | 0.48 | 2 |
| Barbados | 968.66 | 6755.77 | | 199.08 | | 225.06 | | 424.15 | | 424.15 | | 956.41 | | -52.40 | | -102.62 | | -155.02 | | 155.02 | | 0.46 | 1 |
| Belarus | 74.83 | 974.36 | | -328.98 | | -153.57 | | -482.55 | | 482.55 | | 323.74 | | -112.96 | | -18.33 | | -131.28 | | 131.28 | | 0.57 | 2 |
| Belgium | 143.85 | 1368.77 | | -298.02 | | -149.27 | | -447.29 | | 447.29 | | 555.51 | | -46.59 | | -66.47 | | -113.06 | | 113.06 | | 0.60 | 2 |
| Belize | 1519.54 | 6592.19 | | 301.36 | | 262.76 | | 564.12 | | 564.12 | | 1553.30 | | 94.74 | | 101.63 | | 196.37 | | 196.37 | | 0.48 | 4 |
| Benin | 445.30 | 4191.08 | | -10.94 | | -80.46 | | -91.41 | | 91.41 | | 2189.97 | | -56.63 | | -113.43 | | -170.05 | | 170.05 | | -0.30 | 1 |
| Bermuda | 520.09 | 2855.15 | | -259.01 | | 128.64 | | -130.37 | | 387.64 | | 539.42 | | -45.85 | | -3.68 | | -49.53 | | 49.53 | | 0.77 | 1 |
| Bhutan | 539.27 | 3285.51 | | -51.69 | | -145.33 | | -197.02 | | 197.02 | | 1073.40 | | 3.13 | | -29.43 | | -26.30 | | 32.56 | | 0.72 | 4 |
| Bolivia (Plurinational State of) | 1637.96 | 4872.90 | | 339.87 | | 192.34 | | 532.20 | | 532.20 | | 2162.36 | | 100.18 | | 160.81 | | 260.99 | | 260.99 | | 0.34 | 4 |
| Bosnia and Herzegovina | 175.44 | 4085.17 | | -209.98 | | -105.69 | | -315.67 | | 315.67 | | 704.71 | | -74.56 | | -81.14 | | -155.70 | | 155.70 | | 0.34 | 1 |
| Botswana | 346.85 | 5726.67 | | 114.46 | | -232.69 | | -118.23 | | 347.16 | | 1786.26 | | -28.47 | | -146.74 | | -175.21 | | 175.21 | | 0.33 | 1 |
| Brazil | 553.91 | 3400.11 | | -59.54 | | -57.03 | | -116.57 | | 116.57 | | 893.98 | | -37.83 | | -40.65 | | -78.48 | | 78.48 | | 0.20 | 1 |
| Brunei Darussalam | 1101.95 | 6696.80 | | 131.86 | | 299.65 | | 431.51 | | 431.51 | | 1134.80 | | -18.72 | | -14.34 | | -33.06 | | 33.06 | | 0.86 | 4 |
| Bulgaria | 178.53 | 2718.71 | | -307.04 | | -122.70 | | -429.75 | | 429.75 | | 1194.86 | | 26.78 | | -61.53 | | -34.75 | | 88.31 | | 0.66 | 2 |
| Burkina Faso | 425.78 | 3514.04 | | -43.77 | | -140.39 | | -184.16 | | 184.16 | | 2496.80 | | 34.52 | | -103.61 | | -69.09 | | 138.13 | | 0.14 | 1 |
| Burundi | 708.63 | 3955.66 | | 138.60 | | -99.91 | | 38.68 | | 238.51 | | 1598.38 | | 46.21 | | -41.02 | | 5.19 | | 87.24 | | 0.46 | 4 |
| Cabo Verde | 392.26 | 4202.22 | | -107.03 | | -51.09 | | -158.12 | | 158.12 | | 1536.30 | | 13.34 | | -119.09 | | -105.75 | | 132.44 | | 0.09 | 1 |
| Cambodia | 644.21 | 3882.36 | | 38.99 | | -121.24 | | -82.25 | | 160.24 | | 1142.88 | | 51.57 | | -12.93 | | 38.64 | | 64.50 | | 0.43 | 4 |
| Cameroon | 815.54 | 4913.87 | | 195.10 | | -248.38 | | -53.28 | | 443.47 | | 2645.33 | | 16.59 | | 177.30 | | 193.89 | | 193.89 | | 0.39 | 4 |
| Canada | 183.91 | 1898.85 | | -328.78 | | -118.55 | | -447.33 | | 447.33 | | 451.29 | | -64.90 | | 16.81 | | -48.10 | | 81.71 | | 0.69 | 2 |
| Central African Republic | 740.46 | 6627.52 | | 138.77 | | -6.62 | | 132.15 | | 145.39 | | 2723.96 | | 34.72 | | -100.99 | | -66.27 | | 135.71 | | 0.03 | 1 |
| Chad | 407.16 | 3840.27 | | 20.28 | | -170.08 | | -149.80 | | 190.36 | | 1828.10 | | -25.44 | | -127.53 | | -152.96 | | 152.96 | | 0.11 | 1 |
| Chile | 279.90 | 2357.59 | | -283.69 | | -84.14 | | -367.83 | | 367.83 | | 998.08 | | -1.35 | | -69.36 | | -70.71 | | 70.71 | | 0.68 | 2 |
| China | 427.87 | 1589.58 | | -288.00 | | -111.53 | | -399.53 | | 399.53 | | 404.98 | | -15.99 | | 17.10 | | 1.11 | | 33.09 | | 0.85 | 2 |
| Colombia | 303.14 | 2571.85 | | -237.04 | | -77.34 | | -314.38 | | 314.38 | | 937.84 | | -30.60 | | -55.60 | | -86.20 | | 86.20 | | 0.57 | 2 |
| Comoros | 741.66 | 4246.41 | | 151.39 | | -76.08 | | 75.30 | | 227.47 | | 1986.26 | | -0.52 | | -13.17 | | -13.69 | | 13.69 | | 0.89 | 1 |
| Congo | 830.14 | 6250.57 | | 230.32 | | -116.90 | | 113.42 | | 347.22 | | 2907.77 | | 104.34 | | -109.58 | | -5.24 | | 213.91 | | 0.24 | 4 |
| Cook Islands | 1105.08 | 12626.19 | | 372.39 | | 414.22 | | 786.61 | | 786.61 | | 478.26 | | -174.57 | | -171.81 | | -346.39 | | 346.39 | | 0.39 | 1 |
| Costa Rica | 608.70 | 3331.03 | | -70.68 | | -6.10 | | -76.78 | | 76.78 | | 1610.68 | | 48.82 | | -42.88 | | 5.95 | | 91.70 | | -0.09 | 1 |
| Croatia | 144.42 | 2409.56 | | -310.41 | | -141.67 | | -452.08 | | 452.08 | | 811.54 | | -37.95 | | -38.36 | | -76.31 | | 76.31 | | 0.71 | 2 |
| Cuba | 580.22 | 2440.68 | | -250.27 | | 170.50 | | -79.77 | | 420.76 | | 588.72 | | -33.23 | | -35.49 | | -68.72 | | 68.72 | | 0.72 | 1 |
| Cyprus | 235.27 | 2731.19 | | -118.10 | | -153.90 | | -272.00 | | 272.00 | | 987.39 | | -49.64 | | -74.52 | | -124.16 | | 124.16 | | 0.37 | 2 |
| Czechia | 93.60 | 2703.72 | | -352.62 | | -113.14 | | -465.76 | | 465.76 | | 487.82 | | -44.53 | | -73.75 | | -118.28 | | 118.28 | | 0.59 | 2 |
| Ivory Coast | 405.85 | 4355.63 | | 24.76 | | -161.59 | | -136.83 | | 186.35 | | 2328.96 | | -42.48 | | -128.02 | | -170.50 | | 170.50 | | 0.04 | 1 |
| Democratic People's Republic of Korea | 625.42 | 2241.73 | | -195.15 | | -108.25 | | -303.40 | | 303.40 | | 529.85 | | 76.89 | | 29.67 | | 106.56 | | 106.56 | | 0.48 | 1 |
| Democratic Republic of the Congo | 711.96 | 4943.37 | | 184.93 | | -150.38 | | 34.55 | | 335.31 | | 2365.66 | | 3.43 | | -55.86 | | -52.42 | | 59.29 | | 0.70 | 4 |
| Denmark | 165.47 | 1255.17 | | -294.87 | | -147.20 | | -442.07 | | 442.07 | | 660.49 | | -38.39 | | -49.41 | | -87.80 | | 87.80 | | 0.67 | 2 |
| Djibouti | 850.12 | 4120.86 | | 201.09 | | -74.03 | | 127.06 | | 275.12 | | 1859.22 | | 22.06 | | -20.29 | | 1.77 | | 42.36 | | 0.73 | 4 |
| Dominica | 1667.89 | 8244.88 | | 315.39 | | 484.56 | | 799.95 | | 799.95 | | 1604.28 | | 101.35 | | 60.78 | | 162.13 | | 162.13 | | 0.66 | 4 |
| Dominican Republic | 730.36 | 4693.84 | | -48.48 | | 172.92 | | 124.43 | | 221.40 | | 930.71 | | -44.95 | | -46.40 | | -91.35 | | 91.35 | | 0.42 | 1 |
| Ecuador | 1133.30 | 4094.09 | | 0.38 | | 154.00 | | 154.38 | | 154.38 | | 1629.04 | | 171.41 | | -2.45 | | 168.96 | | 173.86 | | -0.06 | 4 |
| Egypt | 1004.83 | 6036.73 | | 165.08 | | 27.88 | | 192.96 | | 192.96 | | 3736.33 | | 187.85 | | -26.12 | | 161.73 | | 213.97 | | -0.05 | 4 |
| El Salvador | 1228.32 | 5104.83 | | 198.11 | | 43.15 | | 241.26 | | 241.26 | | 3926.17 | | 281.43 | | 22.99 | | 304.42 | | 304.42 | | -0.12 | 4 |
| Equatorial Guinea | 841.01 | 6381.61 | | 202.54 | | -34.27 | | 168.27 | | 236.80 | | 2803.29 | | 89.32 | | -98.35 | | -9.02 | | 187.67 | | 0.12 | 4 |
| Eritrea | 772.03 | 4976.86 | | 198.64 | | -116.00 | | 82.64 | | 314.64 | | 1751.69 | | 15.71 | | -19.04 | | -3.33 | | 34.75 | | 0.80 | 4 |
| Estonia | 211.99 | 1826.80 | | -252.11 | | -152.72 | | -404.83 | | 404.83 | | 1033.05 | | -18.69 | | -33.22 | | -51.92 | | 51.92 | | 0.77 | 2 |
| Eswatini | 698.15 | 11245.59 | | 287.39 | | -109.69 | | 177.70 | | 397.07 | | 3290.54 | | 52.98 | | -163.64 | | -110.66 | | 216.62 | | 0.29 | 4 |
| Ethiopia | 1166.05 | 3483.22 | | 162.93 | | -41.46 | | 121.48 | | 204.39 | | 1483.91 | | 137.86 | | 121.33 | | 259.19 | | 259.19 | | -0.12 | 4 |
| Fiji | 2303.23 | 24438.18 | | 653.94 | | 438.59 | | 1092.53 | | 1092.53 | | 814.17 | | 90.49 | | 448.78 | | 539.26 | | 539.26 | | 0.34 | 3 |
| Finland | 106.66 | 1372.70 | | -332.53 | | -124.73 | | -457.27 | | 457.27 | | 314.29 | | -100.73 | | -40.13 | | -140.86 | | 140.86 | | 0.53 | 2 |
| France | 101.02 | 998.01 | | -353.03 | | -119.68 | | -472.71 | | 472.71 | | 425.38 | | -48.16 | | -60.30 | | -108.46 | | 108.46 | | 0.63 | 2 |
| Gabon | 1092.36 | 7318.49 | | 177.16 | | 46.71 | | 223.86 | | 223.86 | | 3609.45 | | 182.98 | | -50.27 | | 132.71 | | 233.25 | | -0.02 | 4 |
| Gambia | 502.83 | 4436.14 | | 142.41 | | -162.28 | | -19.87 | | 304.69 | | 2392.85 | | -16.48 | | -132.48 | | -148.96 | | 148.96 | | 0.34 | 1 |
| Georgia | 240.36 | 2703.49 | | -193.84 | | -226.40 | | -420.23 | | 420.23 | | 996.04 | | -119.27 | | 87.61 | | -31.65 | | 206.88 | | 0.34 | 2 |
| Germany | 186.03 | 1384.56 | | -295.03 | | -143.62 | | -438.65 | | 438.65 | | 770.23 | | -20.97 | | -45.68 | | -66.65 | | 66.65 | | 0.74 | 2 |
| Ghana | 663.16 | 4762.18 | | 154.07 | | -139.74 | | 14.33 | | 293.81 | | 2343.75 | | 30.60 | | -28.69 | | 1.90 | | 59.29 | | 0.66 | 4 |
| Greece | 307.93 | 1492.66 | | -252.35 | | -143.84 | | -396.18 | | 396.18 | | 1070.50 | | 22.42 | | -34.23 | | -11.81 | | 56.65 | | 0.75 | 2 |
| Greenland | 303.33 | 1506.09 | | -324.59 | | -120.80 | | -445.39 | | 445.39 | | 775.26 | | -20.87 | | 16.32 | | -4.55 | | 37.18 | | 0.85 | 2 |
| Grenada | 1946.08 | 9065.51 | | 443.20 | | 611.89 | | 1055.08 | | 1055.08 | | 1898.19 | | 107.05 | | 17.91 | | 124.96 | | 124.96 | | 0.79 | 4 |
| Guam | 1036.70 | 3564.39 | | 60.64 | | 93.59 | | 154.24 | | 154.24 | | 908.12 | | 18.54 | | 76.37 | | 94.91 | | 94.91 | | 0.24 | 4 |
| Guatemala | 898.05 | 7454.98 | | 162.24 | | 177.09 | | 339.34 | | 339.34 | | 2896.01 | | 34.97 | | -157.47 | | -122.50 | | 192.44 | | 0.28 | 4 |
| Guinea | 314.19 | 4011.26 | | 5.23 | | -150.80 | | -145.57 | | 156.02 | | 2091.53 | | -63.54 | | -132.49 | | -196.02 | | 196.02 | | -0.11 | 1 |
| Guinea-Bissau | 544.68 | 5441.63 | | 114.08 | | -157.72 | | -43.64 | | 271.81 | | 2655.88 | | 47.15 | | -136.60 | | -89.46 | | 183.75 | | 0.19 | 1 |
| Guyana | 1925.52 | 10864.17 | | 414.76 | | 797.62 | | 1212.38 | | 1212.38 | | 2030.81 | | 40.05 | | -11.35 | | 28.70 | | 51.40 | | 0.92 | 4 |
| Haiti | 1030.46 | 9018.63 | | 254.36 | | 329.58 | | 583.93 | | 583.93 | | 1193.15 | | -22.07 | | -196.61 | | -218.67 | | 218.67 | | 0.46 | 1 |
| Honduras | 512.87 | 4561.12 | | -114.39 | | 55.19 | | -59.20 | | 169.59 | | 1560.87 | | 4.55 | | -104.08 | | -99.54 | | 108.63 | | 0.22 | 1 |
| Hungary | 105.80 | 2411.23 | | -333.93 | | -129.37 | | -463.30 | | 463.30 | | 646.90 | | -45.64 | | -68.20 | | -113.83 | | 113.83 | | 0.61 | 2 |
| Iceland | 74.72 | 1100.40 | | -346.77 | | -122.08 | | -468.85 | | 468.85 | | 382.69 | | -75.28 | | -62.48 | | -137.76 | | 137.76 | | 0.55 | 2 |
| India | 473.52 | 3409.19 | | -73.32 | | -201.82 | | -275.15 | | 275.15 | | 940.41 | | -35.57 | | 84.78 | | 49.21 | | 120.35 | | 0.39 | 2 |
| Indonesia | 672.35 | 3435.64 | | -33.21 | | -157.53 | | -190.73 | | 190.73 | | 1125.47 | | 31.08 | | 121.72 | | 152.80 | | 152.80 | | 0.11 | 4 |
| Iran (Islamic Republic of) | 382.80 | 3257.91 | | -211.38 | | -33.93 | | -245.31 | | 245.31 | | 1039.22 | | -0.85 | | -71.78 | | -72.63 | | 72.63 | | 0.54 | 1 |
| Iraq | 801.77 | 6979.72 | | 84.01 | | 213.71 | | 297.73 | | 297.73 | | 2120.76 | | -50.72 | | -160.78 | | -211.51 | | 211.51 | | 0.17 | 1 |
| Ireland | 159.95 | 1016.94 | | -315.16 | | -160.64 | | -475.80 | | 475.80 | | 578.73 | | -26.56 | | -21.69 | | -48.25 | | 48.25 | | 0.82 | 2 |
| Israel | 299.68 | 2187.55 | | -207.30 | | -136.39 | | -343.69 | | 343.69 | | 981.41 | | -32.86 | | -21.51 | | -54.37 | | 54.37 | | 0.73 | 2 |
| Italy | 112.52 | 1513.01 | | -343.44 | | -132.39 | | -475.83 | | 475.83 | | 520.37 | | -53.69 | | -35.77 | | -89.46 | | 89.46 | | 0.68 | 2 |
| Jamaica | 938.26 | 6961.06 | | 210.93 | | 142.60 | | 353.53 | | 353.53 | | 1165.90 | | -24.53 | | -52.16 | | -76.69 | | 76.69 | | 0.64 | 1 |
| Japan | 263.59 | 1495.71 | | -301.43 | | -139.71 | | -441.14 | | 441.14 | | 469.82 | | 8.32 | | 6.46 | | 14.79 | | 14.79 | | 0.94 | 2 |
| Jordan | 785.29 | 5690.35 | | -56.92 | | 240.49 | | 183.57 | | 297.41 | | 1359.82 | | 70.73 | | -140.32 | | -69.59 | | 211.05 | | 0.17 | 1 |
| Kazakhstan | 241.20 | 2194.08 | | -352.21 | | -148.10 | | -500.31 | | 500.31 | | 985.33 | | -94.18 | | 167.57 | | 73.38 | | 261.75 | | 0.31 | 2 |
| Kenya | 755.21 | 3196.14 | | 54.48 | | -87.70 | | -33.22 | | 142.17 | | 1686.89 | | 24.72 | | 78.36 | | 103.08 | | 103.08 | | 0.16 | 4 |
| Kiribati | 2102.67 | 17690.59 | | 573.73 | | 512.19 | | 1085.91 | | 1085.91 | | 747.66 | | -35.81 | | 394.53 | | 358.72 | | 430.35 | | 0.43 | 4 |
| Kuwait | 277.28 | 5236.66 | | -175.37 | | 72.19 | | -103.17 | | 247.56 | | 797.53 | | -87.77 | | -214.74 | | -302.51 | | 302.51 | | -0.10 | 1 |
| Kyrgyzstan | 200.50 | 1647.67 | | -351.00 | | -197.74 | | -548.74 | | 548.74 | | 861.97 | | -33.18 | | 89.43 | | 56.25 | | 122.62 | | 0.63 | 2 |
| Lao People's Democratic Republic | 1229.59 | 4486.09 | | 99.86 | | 79.96 | | 179.82 | | 179.82 | | 1727.57 | | 100.43 | | 232.46 | | 332.89 | | 332.89 | | -0.30 | 4 |
| Latvia | 121.28 | 2068.59 | | -283.31 | | -155.68 | | -438.99 | | 438.99 | | 601.02 | | -44.16 | | -74.38 | | -118.54 | | 118.54 | | 0.57 | 2 |
| Lebanon | 445.88 | 4899.00 | | -195.30 | | 142.81 | | -52.49 | | 338.12 | | 1513.17 | | 40.34 | | -173.82 | | -133.48 | | 214.17 | | 0.22 | 1 |
| Lesotho | 441.07 | 9016.33 | | 95.35 | | -238.66 | | -143.31 | | 334.00 | | 3107.61 | | 21.24 | | -144.35 | | -123.10 | | 165.59 | | 0.34 | 1 |
| Liberia | 556.35 | 4506.02 | | 126.52 | | -143.88 | | -17.36 | | 270.40 | | 2616.17 | | 23.23 | | -136.32 | | -113.10 | | 159.55 | | 0.26 | 1 |
| Libya | 676.16 | 4424.48 | | -124.68 | | 122.98 | | -1.69 | | 247.66 | | 2513.10 | | 82.44 | | -109.57 | | -27.13 | | 192.01 | | 0.13 | 1 |
| Lithuania | 100.64 | 1596.78 | | -295.29 | | -147.20 | | -442.48 | | 442.48 | | 512.42 | | -34.21 | | -71.91 | | -106.12 | | 106.12 | | 0.61 | 2 |
| Luxembourg | 170.00 | 1220.92 | | -296.64 | | -146.87 | | -443.51 | | 443.51 | | 687.50 | | -41.50 | | -67.85 | | -109.35 | | 109.35 | | 0.60 | 2 |
| Madagascar | 554.03 | 3246.06 | | -0.57 | | -126.39 | | -126.95 | | 126.95 | | 1255.45 | | 33.47 | | -27.71 | | 5.76 | | 61.18 | | 0.35 | 4 |
| Malawi | 868.04 | 4051.34 | | 201.64 | | -73.82 | | 127.82 | | 275.45 | | 2130.52 | | 54.95 | | -25.37 | | 29.58 | | 80.33 | | 0.55 | 4 |
| Malaysia | 969.25 | 3430.80 | | -124.63 | | 79.05 | | -45.58 | | 203.68 | | 1300.48 | | 62.13 | | 247.07 | | 309.20 | | 309.20 | | -0.21 | 4 |
| Maldives | 812.42 | 2767.85 | | -23.10 | | -38.94 | | -62.04 | | 62.04 | | 1160.73 | | 69.42 | | 55.11 | | 124.53 | | 124.53 | | -0.33 | 4 |
| Mali | 444.92 | 5196.91 | | -34.16 | | 40.02 | | 5.86 | | 74.17 | | 2116.50 | | -66.23 | | -155.22 | | -221.45 | | 221.45 | | -0.50 | 1 |
| Malta | 180.71 | 2125.57 | | -272.16 | | -155.33 | | -427.49 | | 427.49 | | 720.87 | | -22.19 | | -73.30 | | -95.49 | | 95.49 | | 0.63 | 2 |
| Marshall Islands | 2619.29 | 17889.16 | | 718.51 | | 873.33 | | 1591.84 | | 1591.84 | | 898.59 | | 131.72 | | 307.34 | | 439.06 | | 439.06 | | 0.57 | 3 |
| Mauritania | 471.62 | 3424.14 | | -9.06 | | -138.17 | | -147.24 | | 147.24 | | 2204.00 | | -7.61 | | -92.68 | | -100.29 | | 100.29 | | 0.19 | 1 |
| Mauritius | 2534.39 | 11227.68 | | 748.84 | | 518.79 | | 1267.63 | | 1267.63 | | 3069.22 | | 47.42 | | 523.11 | | 570.53 | | 570.53 | | 0.38 | 3 |
| Mexico | 1083.70 | 7609.36 | | 199.78 | | 170.56 | | 370.35 | | 370.35 | | 3077.71 | | 48.00 | | -58.62 | | -10.62 | | 106.62 | | 0.55 | 4 |
| Micronesia (Federated States of) | 2779.64 | 12480.73 | | 924.91 | | 543.94 | | 1468.85 | | 1468.85 | | 924.16 | | 141.39 | | 509.89 | | 651.28 | | 651.28 | | 0.39 | 3 |
| Monaco | 146.10 | 985.21 | | -329.01 | | -144.66 | | -473.67 | | 473.67 | | 552.14 | | -48.96 | | -26.32 | | -75.28 | | 75.28 | | 0.73 | 2 |
| Mongolia | 226.08 | 1644.31 | | -310.96 | | -196.97 | | -507.93 | | 507.93 | | 1037.69 | | -56.73 | | 92.42 | | 35.69 | | 149.16 | | 0.55 | 2 |
| Montenegro | 173.29 | 2843.43 | | -307.72 | | -79.88 | | -387.60 | | 387.60 | | 1121.79 | | 8.26 | | -79.66 | | -71.40 | | 87.92 | | 0.63 | 2 |
| Morocco | 486.92 | 5022.35 | | -186.73 | | 126.70 | | -60.03 | | 313.43 | | 2211.49 | | -10.70 | | -128.13 | | -138.83 | | 138.83 | | 0.39 | 1 |
| Mozambique | 684.03 | 4604.36 | | 186.97 | | -135.80 | | 51.17 | | 322.77 | | 1555.72 | | 17.88 | | -45.25 | | -27.37 | | 63.12 | | 0.67 | 4 |
| Myanmar | 728.64 | 6378.66 | | 147.49 | | 46.94 | | 194.42 | | 194.42 | | 1103.06 | | -80.88 | | -37.41 | | -118.29 | | 118.29 | | 0.24 | 1 |
| Namibia | 331.22 | 6501.20 | | 81.88 | | -252.68 | | -170.80 | | 334.56 | | 1725.97 | | -4.69 | | -168.54 | | -173.23 | | 173.23 | | 0.32 | 1 |
| Nauru | 3031.94 | 15517.20 | | 926.00 | | 614.45 | | 1540.45 | | 1540.45 | | 983.02 | | 133.41 | | 593.76 | | 727.17 | | 727.17 | | 0.36 | 3 |
| Nepal | 567.68 | 3752.98 | | -88.91 | | -109.63 | | -198.54 | | 198.54 | | 1182.72 | | -69.47 | | 139.91 | | 70.43 | | 209.38 | | -0.03 | 2 |
| Netherlands | 130.49 | 1249.81 | | -340.86 | | -148.05 | | -488.91 | | 488.91 | | 594.24 | | -52.08 | | -21.55 | | -73.63 | | 73.63 | | 0.74 | 2 |
| New Zealand | 123.40 | 1525.90 | | -336.56 | | -121.20 | | -457.76 | | 457.76 | | 640.95 | | -48.53 | | -43.10 | | -91.64 | | 91.64 | | 0.67 | 2 |
| Nicaragua | 1047.48 | 4678.06 | | -139.57 | | 220.83 | | 81.26 | | 360.40 | | 3334.13 | | 87.76 | | 199.45 | | 287.21 | | 287.21 | | 0.11 | 4 |
| Niger | 254.10 | 3169.85 | | -109.50 | | -180.16 | | -289.65 | | 289.65 | | 1647.40 | | 16.02 | | -104.30 | | -88.28 | | 120.32 | | 0.41 | 1 |
| Nigeria | 370.28 | 3489.35 | | -96.09 | | -238.70 | | -334.78 | | 334.78 | | 1880.82 | | -13.59 | | 65.82 | | 52.23 | | 79.41 | | 0.62 | 2 |
| Niue | 2579.21 | 13083.45 | | 862.84 | | 480.35 | | 1343.18 | | 1343.18 | | 857.06 | | 173.40 | | 348.12 | | 521.51 | | 521.51 | | 0.44 | 3 |
| North Macedonia | 161.64 | 4095.23 | | -175.94 | | -76.47 | | -252.41 | | 252.41 | | 943.95 | | -94.94 | | -111.82 | | -206.76 | | 206.76 | | 0.10 | 1 |
| Northern Mariana Islands | 2999.38 | 6896.29 | | 647.77 | | 434.04 | | 1081.81 | | 1081.81 | | 658.45 | | 255.62 | | 672.29 | | 927.91 | | 927.91 | | 0.08 | 3 |
| Norway | 90.10 | 1100.61 | | -358.96 | | -135.91 | | -494.87 | | 494.87 | | 415.50 | | -66.09 | | -35.46 | | -101.55 | | 101.55 | | 0.66 | 2 |
| Oman | 715.92 | 5323.08 | | 108.27 | | -10.42 | | 97.84 | | 118.69 | | 2105.55 | | -23.87 | | -30.08 | | -53.94 | | 53.94 | | 0.38 | 1 |
| Pakistan | 671.05 | 4952.82 | | 72.44 | | -7.62 | | 64.83 | | 80.06 | | 1324.84 | | 9.70 | | -90.28 | | -80.59 | | 99.98 | | -0.11 | 1 |
| Palau | 2294.57 | 11537.08 | | 745.07 | | 345.74 | | 1090.81 | | 1090.81 | | 799.59 | | 109.03 | | 525.80 | | 634.83 | | 634.83 | | 0.26 | 3 |
| Palestine | 629.00 | 6022.03 | | 126.69 | | 86.59 | | 213.28 | | 213.28 | | 2133.70 | | -50.91 | | -164.80 | | -215.70 | | 215.70 | | -0.01 | 1 |
| Panama | 575.92 | 4000.32 | | -97.13 | | 5.84 | | -91.29 | | 102.96 | | 1751.69 | | 44.48 | | -88.74 | | -44.26 | | 133.23 | | -0.13 | 1 |
| Papua New Guinea | 699.07 | 9505.76 | | 217.89 | | 169.15 | | 387.04 | | 387.04 | | 399.17 | | -153.57 | | -214.80 | | -368.37 | | 368.37 | | 0.02 | 1 |
| Paraguay | 713.13 | 6117.64 | | 153.05 | | -14.29 | | 138.77 | | 167.34 | | 1103.50 | | 4.87 | | -131.40 | | -126.53 | | 136.26 | | 0.10 | 1 |
| Peru | 825.35 | 2318.42 | | -57.13 | | -54.66 | | -111.79 | | 111.79 | | 1191.71 | | 95.56 | | 84.23 | | 179.79 | | 179.79 | | -0.23 | 4 |
| Philippines | 1217.44 | 4288.00 | | 261.55 | | -131.76 | | 129.79 | | 393.31 | | 1822.44 | | 125.24 | | 190.57 | | 315.81 | | 315.81 | | 0.11 | 4 |
| Poland | 104.19 | 2450.31 | | -346.84 | | -122.21 | | -469.05 | | 469.05 | | 499.81 | | -32.85 | | -65.46 | | -98.31 | | 98.31 | | 0.65 | 2 |
| Portugal | 190.60 | 2171.18 | | -311.76 | | -148.58 | | -460.34 | | 460.34 | | 712.00 | | -27.74 | | -37.12 | | -64.86 | | 64.86 | | 0.75 | 2 |
| Puerto Rico | 1151.53 | 6103.16 | | 88.17 | | 310.27 | | 398.44 | | 398.44 | | 946.83 | | 4.41 | | 13.08 | | 17.49 | | 17.49 | | 0.92 | 4 |
| Qatar | 604.28 | 8680.72 | | 156.45 | | 49.60 | | 206.05 | | 206.05 | | 1883.26 | | -23.03 | | -184.30 | | -207.33 | | 207.33 | | 0.00 | 1 |
| Republic of Korea | 295.21 | 2848.72 | | -331.79 | | 88.09 | | -243.70 | | 419.88 | | 400.98 | | -55.62 | | -65.34 | | -120.96 | | 120.96 | | 0.55 | 1 |
| Republic of Moldova | 111.60 | 1936.56 | | -287.68 | | -157.42 | | -445.10 | | 445.10 | | 502.19 | | -80.78 | | -25.57 | | -106.35 | | 106.35 | | 0.61 | 2 |
| Romania | 99.26 | 1532.82 | | -317.76 | | -157.65 | | -475.41 | | 475.41 | | 708.64 | | -37.77 | | -53.02 | | -90.79 | | 90.79 | | 0.68 | 2 |
| Russian Federation | 100.62 | 2091.00 | | -321.50 | | -125.40 | | -446.90 | | 446.90 | | 453.53 | | -55.88 | | -74.26 | | -130.14 | | 130.14 | | 0.55 | 2 |
| Rwanda | 621.34 | 3546.07 | | 49.85 | | -103.56 | | -53.71 | | 153.40 | | 1890.98 | | -5.04 | | -31.29 | | -36.32 | | 36.32 | | 0.62 | 1 |
| Saint Kitts and Nevis | 1917.36 | 6575.38 | | 326.01 | | 485.97 | | 811.98 | | 811.98 | | 1819.43 | | 143.59 | | 120.22 | | 263.81 | | 263.81 | | 0.51 | 4 |
| Saint Lucia | 1256.81 | 7342.12 | | 195.99 | | 392.63 | | 588.62 | | 588.62 | | 1317.79 | | 9.31 | | -6.75 | | 2.56 | | 16.06 | | 0.95 | 4 |
| Saint Vincent and the Grenadines | 1278.63 | 8520.27 | | 225.75 | | 390.07 | | 615.82 | | 615.82 | | 1372.16 | | 31.73 | | -34.81 | | -3.08 | | 66.54 | | 0.80 | 4 |
| Samoa | 2095.54 | 10619.60 | | 535.18 | | 592.22 | | 1127.40 | | 1127.40 | | 771.33 | | 143.72 | | 68.05 | | 211.77 | | 211.77 | | 0.68 | 4 |
| San Marino | 93.35 | 1082.98 | | -331.89 | | -147.78 | | -479.68 | | 479.68 | | 334.30 | | -109.06 | | -13.75 | | -122.81 | | 122.81 | | 0.59 | 2 |
| Sao Tome and Principe | 876.65 | 2766.48 | | 11.71 | | -83.73 | | -72.03 | | 95.44 | | 3754.50 | | 268.44 | | -13.73 | | 254.71 | | 282.17 | | -0.49 | 4 |
| Saudi Arabia | 1483.17 | 4513.54 | | 25.88 | | 251.22 | | 277.10 | | 277.10 | | 3922.90 | | 338.79 | | 69.09 | | 407.88 | | 407.88 | | -0.19 | 4 |
| Senegal | 550.02 | 5111.86 | | 81.98 | | -61.26 | | 20.72 | | 143.24 | | 2246.71 | | -63.20 | | -36.72 | | -99.92 | | 99.92 | | 0.18 | 1 |
| Serbia | 189.53 | 3325.47 | | -214.82 | | -32.78 | | -247.60 | | 247.60 | | 939.44 | | -56.18 | | -120.52 | | -176.70 | | 176.70 | | 0.17 | 1 |
| Seychelles | 1405.14 | 4863.26 | | -166.85 | | 446.80 | | 279.95 | | 613.65 | | 1818.95 | | 123.88 | | 297.27 | | 421.15 | | 421.15 | | 0.19 | 4 |
| Sierra Leone | 353.41 | 3612.28 | | -44.58 | | -166.19 | | -210.77 | | 210.77 | | 1673.18 | | 11.85 | | -125.02 | | -113.18 | | 136.87 | | 0.21 | 1 |
| Singapore | 365.08 | 1893.86 | | -282.75 | | 79.07 | | -203.68 | | 361.83 | | 401.60 | | -45.30 | | -85.44 | | -130.74 | | 130.74 | | 0.47 | 1 |
| Slovakia | 125.33 | 1782.68 | | -336.23 | | -145.79 | | -482.02 | | 482.02 | | 624.89 | | -45.19 | | -39.18 | | -84.36 | | 84.36 | | 0.70 | 2 |
| Slovenia | 78.70 | 1722.83 | | -353.33 | | -150.90 | | -504.22 | | 504.22 | | 445.00 | | -27.43 | | -49.28 | | -76.71 | | 76.71 | | 0.74 | 2 |
| Solomon Islands | 1209.54 | 10749.42 | | 469.86 | | -41.75 | | 428.11 | | 511.61 | | 560.45 | | -19.61 | | 107.95 | | 88.34 | | 127.56 | | 0.60 | 4 |
| Somalia | 1009.05 | 4945.41 | | 274.88 | | -65.37 | | 209.51 | | 340.25 | | 2314.11 | | 70.55 | | 9.43 | | 79.98 | | 79.98 | | 0.62 | 4 |
| South Africa | 368.98 | 7381.92 | | 32.24 | | -114.58 | | -82.33 | | 146.82 | | 2042.28 | | -50.76 | | -162.77 | | -213.53 | | 213.53 | | -0.19 | 1 |
| South Sudan | 1128.66 | 4929.52 | | 279.01 | | -55.69 | | 223.32 | | 334.69 | | 2463.05 | | 119.39 | | 22.25 | | 141.64 | | 141.64 | | 0.41 | 4 |
| Spain | 139.89 | 1879.46 | | -340.97 | | -132.13 | | -473.10 | | 473.10 | | 546.83 | | -50.87 | | -51.17 | | -102.04 | | 102.04 | | 0.65 | 2 |
| Sri Lanka | 653.69 | 6368.50 | | 42.67 | | 193.05 | | 235.72 | | 235.72 | | 1007.86 | | -128.42 | | -99.75 | | -228.17 | | 228.17 | | 0.02 | 1 |
| Sudan | 349.80 | 3067.52 | | -199.50 | | -76.01 | | -275.51 | | 275.51 | | 1916.15 | | 16.80 | | -54.73 | | -37.92 | | 71.53 | | 0.59 | 1 |
| Suriname | 1405.04 | 6640.25 | | 132.08 | | 417.20 | | 549.28 | | 549.28 | | 1387.49 | | 90.23 | | 44.40 | | 134.63 | | 134.63 | | 0.61 | 4 |
| Sweden | 120.57 | 1273.05 | | -352.01 | | -128.47 | | -480.48 | | 480.48 | | 470.40 | | -46.91 | | -57.50 | | -104.42 | | 104.42 | | 0.64 | 2 |
| Switzerland | 136.73 | 1626.10 | | -305.87 | | -156.67 | | -462.54 | | 462.54 | | 566.83 | | -42.43 | | -52.36 | | -94.79 | | 94.79 | | 0.66 | 2 |
| Syrian Arab Republic | 680.68 | 3439.55 | | -135.74 | | 63.87 | | -71.87 | | 199.61 | | 2371.38 | | 85.86 | | -30.09 | | 55.77 | | 115.95 | | 0.27 | 1 |
| Taiwan (Province of China) | 827.56 | 3110.49 | | 32.27 | | -7.82 | | 24.45 | | 40.08 | | 618.36 | | 36.17 | | 35.35 | | 71.52 | | 71.52 | | -0.28 | 4 |
| Tajikistan | 116.30 | 2193.77 | | -289.64 | | -209.71 | | -499.36 | | 499.36 | | 434.34 | | -93.64 | | 63.81 | | -29.83 | | 157.45 | | 0.52 | 2 |
| Thailand | 920.78 | 3163.14 | | 10.59 | | -86.50 | | -75.91 | | 97.10 | | 1337.19 | | 55.38 | | 215.36 | | 270.74 | | 270.74 | | -0.47 | 4 |
| Timor-Leste | 860.59 | 3377.70 | | 23.66 | | -44.59 | | -20.93 | | 68.25 | | 1397.06 | | 55.59 | | 129.56 | | 185.15 | | 185.15 | | -0.46 | 4 |
| Togo | 435.97 | 3448.28 | | -11.14 | | -135.33 | | -146.46 | | 146.46 | | 1968.34 | | -33.39 | | -109.60 | | -142.99 | | 142.99 | | 0.01 | 1 |
| Tonga | 1079.92 | 11720.45 | | 404.21 | | 321.53 | | 725.74 | | 725.74 | | 497.49 | | -270.98 | | -41.94 | | -312.92 | | 312.92 | | 0.40 | 1 |
| Trinidad and Tobago | 1363.96 | 11088.82 | | 349.16 | | 280.34 | | 629.51 | | 629.51 | | 1421.74 | | 58.94 | | -39.83 | | 19.11 | | 98.77 | | 0.73 | 4 |
| Tunisia | 478.63 | 3540.63 | | -297.82 | | 124.51 | | -173.32 | | 422.33 | | 1603.49 | | 69.57 | | -114.18 | | -44.61 | | 183.75 | | 0.39 | 1 |
| Turkey | 485.68 | 3503.93 | | -179.42 | | -6.24 | | -185.66 | | 185.66 | | 1441.73 | | 27.27 | | -50.74 | | -23.47 | | 78.01 | | 0.41 | 1 |
| Turkmenistan | 294.29 | 2747.37 | | -182.06 | | -245.97 | | -428.04 | | 428.04 | | 1290.16 | | -5.38 | | 66.87 | | 61.49 | | 72.25 | | 0.71 | 2 |
| Tuvalu | 1986.26 | 10395.72 | | 634.80 | | 282.99 | | 917.78 | | 917.78 | | 729.64 | | 83.63 | | 268.70 | | 352.33 | | 352.33 | | 0.45 | 4 |
| Uganda | 813.98 | 4018.06 | | 194.28 | | -83.38 | | 110.90 | | 277.67 | | 1700.38 | | 28.05 | | -14.56 | | 13.49 | | 42.61 | | 0.73 | 4 |
| Ukraine | 74.91 | 1138.79 | | -301.00 | | -149.35 | | -450.35 | | 450.35 | | 328.59 | | -105.38 | | -54.59 | | -159.98 | | 159.98 | | 0.48 | 2 |
| United Arab Emirates | 716.25 | 5017.69 | | -25.54 | | 88.74 | | 63.20 | | 114.29 | | 1816.96 | | -0.53 | | -6.18 | | -6.70 | | 6.70 | | 0.89 | 1 |
| United Kingdom | 128.39 | 1462.51 | | -297.03 | | -153.52 | | -450.54 | | 450.54 | | 467.49 | | -49.31 | | -28.44 | | -77.76 | | 77.76 | | 0.71 | 2 |
| United Republic of Tanzania | 363.11 | 3387.79 | | -3.73 | | -124.66 | | -128.38 | | 128.38 | | 2151.52 | | -47.63 | | -52.88 | | -100.51 | | 100.51 | | 0.12 | 1 |
| United States Virgin Islands | 635.84 | 5895.49 | | -151.81 | | 164.02 | | 12.22 | | 315.83 | | 698.40 | | -26.48 | | -82.36 | | -108.84 | | 108.84 | | 0.49 | 1 |
| United States of America | 668.08 | 2899.31 | | -160.02 | | 93.50 | | -66.52 | | 253.52 | | 950.20 | | -17.93 | | -27.42 | | -45.36 | | 45.36 | | 0.70 | 1 |
| Uruguay | 247.58 | 2409.52 | | -266.27 | | -119.66 | | -385.92 | | 385.92 | | 925.05 | | -22.79 | | -42.81 | | -65.60 | | 65.60 | | 0.71 | 2 |
| Uzbekistan | 257.15 | 3550.63 | | -173.08 | | -213.22 | | -386.31 | | 386.31 | | 1130.19 | | -92.96 | | 75.42 | | -17.54 | | 168.37 | | 0.39 | 2 |
| Vanuatu | 1700.65 | 9546.54 | | 433.85 | | 282.86 | | 716.71 | | 716.71 | | 671.68 | | 46.25 | | 306.05 | | 352.30 | | 352.30 | | 0.34 | 4 |
| Venezuela (Bolivarian Republic of) | 739.29 | 5021.66 | | 82.22 | | 9.52 | | 91.74 | | 91.74 | | 2362.09 | | 0.54 | | -99.33 | | -98.79 | | 99.86 | | -0.04 | 1 |
| Viet Nam | 731.62 | 3710.75 | | 40.67 | | -134.64 | | -93.97 | | 175.31 | | 1096.13 | | 59.74 | | 18.53 | | 78.28 | | 78.28 | | 0.38 | 4 |
| Yemen | 338.67 | 2498.47 | | -263.60 | | -154.42 | | -418.02 | | 418.02 | | 1220.27 | | 66.01 | | -20.62 | | 45.39 | | 86.63 | | 0.66 | 1 |
| Zambia | 1063.88 | 4616.79 | | 221.26 | | -50.39 | | 170.87 | | 271.65 | | 2373.05 | | 97.34 | | 30.03 | | 127.37 | | 127.37 | | 0.36 | 4 |
| Zimbabwe | 462.64 | 6373.84 | | 97.37 | | -232.20 | | -134.83 | | 329.57 | | 2612.01 | | 13.19 | | -90.90 | | -77.71 | | 104.08 | | 0.52 | 1 |
| Cluster 1 | 554.87 | 5061.88 | | -17.86 | | 6.31 | | -11.56 | | 262.41 | | 1631.34 | | -18.60 | | -97.67 | | -116.27 | | 144.88 | | 0.27 | 1 |
| Cluster 2 | 186.01 | 1923.53 | | -289.69 | | -148.18 | | -437.88 | | 437.88 | | 712.20 | | -44.68 | | -18.69 | | -63.36 | | 101.09 | | 0.63 | 2 |
| Cluster 3 | 2754.98 | 14043.06 | | 803.02 | | 574.66 | | 1377.68 | | 1377.68 | | 1097.12 | | 142.60 | | 499.54 | | 642.14 | | 642.14 | | 0.36 | 3 |
| Cluster 4 | 1125.27 | 5865.27 | | 176.59 | | 103.47 | | 280.06 | | 395.21 | | 1851.15 | | 77.25 | | 50.80 | | 128.05 | | 167.44 | | 0.34 | 4 |
| Global | 706.53 | 4723.55 | | -8.36 | | 12.28 | | 3.92 | | 405.56 | | 1387.37 | | 8.78 | | -2.80 | | 5.99 | | 160.00 | | 0.41 | Global |

The DALYs data in the table have been age-adjusted to better reflect disease burden across different age groups in each country. CKD-nonDM represents the total burden of chronic kidney disease (CKD) caused by hypertension, glomerulonephritis, and other risk factors. The calculation of the RDSR is detailed in the Method section under "Calculation of the relative driver structure ratio (RDSR)." The abbreviations used in this manuscript are as follows: DALYs = Disability-Adjusted Life Years; SHAP = SHapley Additive exPlanations; RDSR = Relative Driver Structure Ratio; CKD = Chronic Kidney Disease ; T2DM = Type 2 Diabetes Mellitus ; CKD-T2DM = Chronic Kidney Disease due to Type 2 Diabetes Mellitus.

# Supplementary Table 7. Cluster-level risk-factor exposure profiles

| **Cluster** | **Risk factor** | **Mean SEV** | **Global mean SEV** | **Relative to global mean** | **Exposure interpretation** |
| --- | --- | --- | --- | --- | --- |
| Cluster 1 | Diet high in processed meat | 15.01 | 21.75 | 0.69 | Lower than global mean |
| Cluster 1 | Diet high in red meat | 25.56 | 34.62 | 0.74 | Lower than global mean |
| Cluster 1 | Diet low in fruits | 37.50 | 39.88 | 0.94 | Comparable to global mean |
| Cluster 1 | Diet low in whole grains | 53.33 | 51.54 | 1.03 | Comparable to global mean |
| Cluster 1 | High body mass index | 36.01 | 27.98 | 1.29 | Elevated vs global mean |
| Cluster 1 | High fasting plasma glucose | 19.02 | 16.47 | 1.16 | Comparable to global mean |
| Cluster 1 | High systolic blood pressure | 44.91 | 41.12 | 1.09 | Comparable to global mean |
| Cluster 1 | Kidney dysfunction | 4.67 | 4.41 | 1.06 | Comparable to global mean |
| Cluster 1 | Low physical activity | 28.62 | 28.64 | 1.00 | Comparable to global mean |
| Cluster 1 | Low temperature | 19.77 | 24.47 | 0.81 | Comparable to global mean |
| Cluster 2 | Diet high in processed meat | 39.14 | 21.75 | 1.80 | Elevated vs global mean |
| Cluster 2 | Diet high in red meat | 45.31 | 34.62 | 1.31 | Elevated vs global mean |
| Cluster 2 | Diet low in fruits | 33.73 | 39.88 | 0.85 | Comparable to global mean |
| Cluster 2 | Diet low in whole grains | 56.85 | 51.54 | 1.10 | Comparable to global mean |
| Cluster 2 | High body mass index | 36.42 | 27.98 | 1.30 | Elevated vs global mean |
| Cluster 2 | High fasting plasma glucose | 14.37 | 16.47 | 0.87 | Comparable to global mean |
| Cluster 2 | High systolic blood pressure | 46.10 | 41.12 | 1.12 | Comparable to global mean |
| Cluster 2 | Kidney dysfunction | 4.57 | 4.41 | 1.04 | Comparable to global mean |
| Cluster 2 | Low physical activity | 26.82 | 28.64 | 0.94 | Comparable to global mean |
| Cluster 2 | Low temperature | 25.53 | 24.47 | 1.04 | Comparable to global mean |
| Cluster 3 | Diet high in processed meat | 10.66 | 21.75 | 0.49 | Lower than global mean |
| Cluster 3 | Diet high in red meat | 32.58 | 34.62 | 0.94 | Comparable to global mean |
| Cluster 3 | Diet low in fruits | 44.25 | 39.88 | 1.11 | Comparable to global mean |
| Cluster 3 | Diet low in whole grains | 62.47 | 51.54 | 1.21 | Comparable to global mean |
| Cluster 3 | High body mass index | 54.83 | 27.98 | 1.96 | Elevated vs global mean |
| Cluster 3 | High fasting plasma glucose | 37.09 | 16.47 | 2.25 | Elevated vs global mean |
| Cluster 3 | High systolic blood pressure | 42.66 | 41.12 | 1.04 | Comparable to global mean |
| Cluster 3 | Kidney dysfunction | 5.21 | 4.41 | 1.18 | Comparable to global mean |
| Cluster 3 | Low physical activity | 44.86 | 28.64 | 1.57 | Elevated vs global mean |
| Cluster 3 | Low temperature | 3.78 | 24.47 | 0.15 | Lower than global mean |
| Cluster 4 | Diet high in processed meat | 12.19 | 21.75 | 0.56 | Lower than global mean |
| Cluster 4 | Diet high in red meat | 21.73 | 34.62 | 0.63 | Lower than global mean |
| Cluster 4 | Diet low in fruits | 35.89 | 39.88 | 0.90 | Comparable to global mean |
| Cluster 4 | Diet low in whole grains | 46.51 | 51.54 | 0.90 | Comparable to global mean |
| Cluster 4 | High body mass index | 31.02 | 27.98 | 1.11 | Comparable to global mean |
| Cluster 4 | High fasting plasma glucose | 18.19 | 16.47 | 1.10 | Comparable to global mean |
| Cluster 4 | High systolic blood pressure | 42.82 | 41.12 | 1.04 | Comparable to global mean |
| Cluster 4 | Kidney dysfunction | 4.58 | 4.41 | 1.04 | Comparable to global mean |
| Cluster 4 | Low physical activity | 24.33 | 28.64 | 0.85 | Comparable to global mean |
| Cluster 4 | Low temperature | 10.70 | 24.47 | 0.44 | Lower than global mean |

SEV values refer to 2021 summary exposure values among adults aged 45 years or older; ratios >1 indicate higher exposure than the global mean.

# Supplementary Table 8. Global and cluster-specific RDSR trajectory estimates, 1990–2050

| **Cluster** | **RDSR mean** | **Lower credible interval** | **Upper credible interval** | **Period** |
| --- | --- | --- | --- | --- |
| Global | 0.205 | 0.141 | 0.269 | Historical/fitted |
| Global | 0.212 | 0.149 | 0.276 | Historical/fitted |
| Global | 0.220 | 0.156 | 0.283 | Historical/fitted |
| Global | 0.227 | 0.163 | 0.291 | Historical/fitted |
| Global | 0.234 | 0.171 | 0.298 | Historical/fitted |
| Global | 0.242 | 0.178 | 0.305 | Historical/fitted |
| Global | 0.249 | 0.185 | 0.312 | Historical/fitted |
| Global | 0.256 | 0.193 | 0.320 | Historical/fitted |
| Global | 0.263 | 0.200 | 0.327 | Historical/fitted |
| Global | 0.271 | 0.207 | 0.334 | Historical/fitted |
| Global | 0.278 | 0.214 | 0.341 | Historical/fitted |
| Global | 0.285 | 0.222 | 0.349 | Historical/fitted |
| Global | 0.293 | 0.229 | 0.356 | Historical/fitted |
| Global | 0.300 | 0.236 | 0.363 | Historical/fitted |
| Global | 0.307 | 0.244 | 0.371 | Historical/fitted |
| Global | 0.314 | 0.251 | 0.378 | Historical/fitted |
| Global | 0.322 | 0.258 | 0.385 | Historical/fitted |
| Global | 0.329 | 0.266 | 0.392 | Historical/fitted |
| Global | 0.336 | 0.273 | 0.400 | Historical/fitted |
| Global | 0.344 | 0.280 | 0.407 | Historical/fitted |
| Global | 0.351 | 0.287 | 0.414 | Historical/fitted |
| Global | 0.358 | 0.295 | 0.422 | Historical/fitted |
| Global | 0.365 | 0.302 | 0.429 | Historical/fitted |
| Global | 0.373 | 0.309 | 0.436 | Historical/fitted |
| Global | 0.380 | 0.316 | 0.444 | Historical/fitted |
| Global | 0.387 | 0.324 | 0.451 | Historical/fitted |
| Global | 0.395 | 0.331 | 0.458 | Historical/fitted |
| Global | 0.402 | 0.338 | 0.466 | Historical/fitted |
| Global | 0.409 | 0.345 | 0.473 | Historical/fitted |
| Global | 0.416 | 0.353 | 0.480 | Historical/fitted |
| Global | 0.424 | 0.360 | 0.488 | Historical/fitted |
| Global | 0.431 | 0.367 | 0.495 | Historical/fitted |
| Global | 0.438 | 0.374 | 0.502 | Projected |
| Global | 0.446 | 0.382 | 0.510 | Projected |
| Global | 0.453 | 0.389 | 0.517 | Projected |
| Global | 0.460 | 0.396 | 0.524 | Projected |
| Global | 0.467 | 0.403 | 0.532 | Projected |
| Global | 0.475 | 0.410 | 0.539 | Projected |
| Global | 0.482 | 0.418 | 0.546 | Projected |
| Global | 0.489 | 0.425 | 0.554 | Projected |
| Global | 0.497 | 0.432 | 0.561 | Projected |
| Global | 0.504 | 0.439 | 0.569 | Projected |
| Global | 0.511 | 0.446 | 0.576 | Projected |
| Global | 0.518 | 0.454 | 0.583 | Projected |
| Global | 0.526 | 0.461 | 0.591 | Projected |
| Global | 0.533 | 0.468 | 0.598 | Projected |
| Global | 0.540 | 0.475 | 0.605 | Projected |
| Global | 0.548 | 0.482 | 0.613 | Projected |
| Global | 0.555 | 0.490 | 0.620 | Projected |
| Global | 0.562 | 0.497 | 0.628 | Projected |
| Global | 0.569 | 0.504 | 0.635 | Projected |
| Global | 0.577 | 0.511 | 0.643 | Projected |
| Global | 0.584 | 0.518 | 0.650 | Projected |
| Global | 0.591 | 0.525 | 0.657 | Projected |
| Global | 0.599 | 0.533 | 0.665 | Projected |
| Global | 0.606 | 0.540 | 0.672 | Projected |
| Global | 0.613 | 0.547 | 0.680 | Projected |
| Global | 0.621 | 0.554 | 0.687 | Projected |
| Global | 0.628 | 0.561 | 0.694 | Projected |
| Global | 0.635 | 0.568 | 0.702 | Projected |
| Global | 0.642 | 0.575 | 0.709 | Projected |
| Cluster 1 | 0.095 | 0.021 | 0.169 | Historical/fitted |
| Cluster 1 | 0.102 | 0.028 | 0.176 | Historical/fitted |
| Cluster 1 | 0.109 | 0.035 | 0.182 | Historical/fitted |
| Cluster 1 | 0.115 | 0.042 | 0.189 | Historical/fitted |
| Cluster 1 | 0.122 | 0.049 | 0.196 | Historical/fitted |
| Cluster 1 | 0.129 | 0.056 | 0.202 | Historical/fitted |
| Cluster 1 | 0.136 | 0.062 | 0.209 | Historical/fitted |
| Cluster 1 | 0.142 | 0.069 | 0.215 | Historical/fitted |
| Cluster 1 | 0.149 | 0.076 | 0.222 | Historical/fitted |
| Cluster 1 | 0.156 | 0.083 | 0.229 | Historical/fitted |
| Cluster 1 | 0.163 | 0.090 | 0.235 | Historical/fitted |
| Cluster 1 | 0.169 | 0.097 | 0.242 | Historical/fitted |
| Cluster 1 | 0.176 | 0.103 | 0.249 | Historical/fitted |
| Cluster 1 | 0.183 | 0.110 | 0.255 | Historical/fitted |
| Cluster 1 | 0.190 | 0.117 | 0.262 | Historical/fitted |
| Cluster 1 | 0.196 | 0.124 | 0.269 | Historical/fitted |
| Cluster 1 | 0.203 | 0.130 | 0.276 | Historical/fitted |
| Cluster 1 | 0.210 | 0.137 | 0.282 | Historical/fitted |
| Cluster 1 | 0.216 | 0.144 | 0.289 | Historical/fitted |
| Cluster 1 | 0.223 | 0.150 | 0.296 | Historical/fitted |
| Cluster 1 | 0.230 | 0.157 | 0.303 | Historical/fitted |
| Cluster 1 | 0.237 | 0.164 | 0.310 | Historical/fitted |
| Cluster 1 | 0.243 | 0.171 | 0.316 | Historical/fitted |
| Cluster 1 | 0.250 | 0.177 | 0.323 | Historical/fitted |
| Cluster 1 | 0.257 | 0.184 | 0.330 | Historical/fitted |
| Cluster 1 | 0.264 | 0.190 | 0.337 | Historical/fitted |
| Cluster 1 | 0.270 | 0.197 | 0.344 | Historical/fitted |
| Cluster 1 | 0.277 | 0.204 | 0.351 | Historical/fitted |
| Cluster 1 | 0.284 | 0.210 | 0.357 | Historical/fitted |
| Cluster 1 | 0.291 | 0.217 | 0.364 | Historical/fitted |
| Cluster 1 | 0.297 | 0.223 | 0.371 | Historical/fitted |
| Cluster 1 | 0.304 | 0.230 | 0.378 | Historical/fitted |
| Cluster 1 | 0.311 | 0.237 | 0.385 | Projected |
| Cluster 1 | 0.318 | 0.243 | 0.392 | Projected |
| Cluster 1 | 0.324 | 0.250 | 0.399 | Projected |
| Cluster 1 | 0.331 | 0.256 | 0.406 | Projected |
| Cluster 1 | 0.338 | 0.263 | 0.413 | Projected |
| Cluster 1 | 0.345 | 0.269 | 0.420 | Projected |
| Cluster 1 | 0.351 | 0.276 | 0.427 | Projected |
| Cluster 1 | 0.358 | 0.282 | 0.434 | Projected |
| Cluster 1 | 0.365 | 0.289 | 0.441 | Projected |
| Cluster 1 | 0.372 | 0.295 | 0.448 | Projected |
| Cluster 1 | 0.378 | 0.301 | 0.455 | Projected |
| Cluster 1 | 0.385 | 0.308 | 0.462 | Projected |
| Cluster 1 | 0.392 | 0.314 | 0.469 | Projected |
| Cluster 1 | 0.398 | 0.321 | 0.476 | Projected |
| Cluster 1 | 0.405 | 0.327 | 0.483 | Projected |
| Cluster 1 | 0.412 | 0.333 | 0.490 | Projected |
| Cluster 1 | 0.419 | 0.340 | 0.498 | Projected |
| Cluster 1 | 0.425 | 0.346 | 0.505 | Projected |
| Cluster 1 | 0.432 | 0.353 | 0.512 | Projected |
| Cluster 1 | 0.439 | 0.359 | 0.519 | Projected |
| Cluster 1 | 0.446 | 0.365 | 0.526 | Projected |
| Cluster 1 | 0.452 | 0.372 | 0.533 | Projected |
| Cluster 1 | 0.459 | 0.378 | 0.540 | Projected |
| Cluster 1 | 0.466 | 0.384 | 0.548 | Projected |
| Cluster 1 | 0.473 | 0.390 | 0.555 | Projected |
| Cluster 1 | 0.479 | 0.397 | 0.562 | Projected |
| Cluster 1 | 0.486 | 0.403 | 0.569 | Projected |
| Cluster 1 | 0.493 | 0.409 | 0.576 | Projected |
| Cluster 1 | 0.500 | 0.416 | 0.584 | Projected |
| Cluster 2 | 0.368 | 0.325 | 0.411 | Historical/fitted |
| Cluster 2 | 0.376 | 0.333 | 0.419 | Historical/fitted |
| Cluster 2 | 0.384 | 0.341 | 0.427 | Historical/fitted |
| Cluster 2 | 0.392 | 0.349 | 0.435 | Historical/fitted |
| Cluster 2 | 0.400 | 0.357 | 0.443 | Historical/fitted |
| Cluster 2 | 0.408 | 0.365 | 0.451 | Historical/fitted |
| Cluster 2 | 0.416 | 0.373 | 0.458 | Historical/fitted |
| Cluster 2 | 0.424 | 0.381 | 0.466 | Historical/fitted |
| Cluster 2 | 0.432 | 0.389 | 0.474 | Historical/fitted |
| Cluster 2 | 0.440 | 0.397 | 0.482 | Historical/fitted |
| Cluster 2 | 0.448 | 0.405 | 0.490 | Historical/fitted |
| Cluster 2 | 0.456 | 0.413 | 0.498 | Historical/fitted |
| Cluster 2 | 0.464 | 0.421 | 0.506 | Historical/fitted |
| Cluster 2 | 0.472 | 0.429 | 0.514 | Historical/fitted |
| Cluster 2 | 0.480 | 0.437 | 0.522 | Historical/fitted |
| Cluster 2 | 0.488 | 0.445 | 0.530 | Historical/fitted |
| Cluster 2 | 0.496 | 0.453 | 0.538 | Historical/fitted |
| Cluster 2 | 0.504 | 0.461 | 0.546 | Historical/fitted |
| Cluster 2 | 0.512 | 0.469 | 0.554 | Historical/fitted |
| Cluster 2 | 0.520 | 0.477 | 0.562 | Historical/fitted |
| Cluster 2 | 0.528 | 0.485 | 0.570 | Historical/fitted |
| Cluster 2 | 0.536 | 0.493 | 0.578 | Historical/fitted |
| Cluster 2 | 0.544 | 0.501 | 0.586 | Historical/fitted |
| Cluster 2 | 0.552 | 0.509 | 0.594 | Historical/fitted |
| Cluster 2 | 0.560 | 0.517 | 0.602 | Historical/fitted |
| Cluster 2 | 0.568 | 0.525 | 0.610 | Historical/fitted |
| Cluster 2 | 0.576 | 0.533 | 0.618 | Historical/fitted |
| Cluster 2 | 0.584 | 0.541 | 0.626 | Historical/fitted |
| Cluster 2 | 0.592 | 0.549 | 0.635 | Historical/fitted |
| Cluster 2 | 0.600 | 0.557 | 0.643 | Historical/fitted |
| Cluster 2 | 0.608 | 0.565 | 0.651 | Historical/fitted |
| Cluster 2 | 0.616 | 0.572 | 0.659 | Historical/fitted |
| Cluster 2 | 0.624 | 0.580 | 0.667 | Projected |
| Cluster 2 | 0.632 | 0.588 | 0.675 | Projected |
| Cluster 2 | 0.640 | 0.596 | 0.683 | Projected |
| Cluster 2 | 0.648 | 0.604 | 0.691 | Projected |
| Cluster 2 | 0.656 | 0.612 | 0.700 | Projected |
| Cluster 2 | 0.664 | 0.619 | 0.708 | Projected |
| Cluster 2 | 0.672 | 0.627 | 0.716 | Projected |
| Cluster 2 | 0.680 | 0.635 | 0.724 | Projected |
| Cluster 2 | 0.688 | 0.643 | 0.732 | Projected |
| Cluster 2 | 0.696 | 0.651 | 0.740 | Projected |
| Cluster 2 | 0.704 | 0.659 | 0.749 | Projected |
| Cluster 2 | 0.712 | 0.666 | 0.757 | Projected |
| Cluster 2 | 0.720 | 0.674 | 0.765 | Projected |
| Cluster 2 | 0.728 | 0.682 | 0.773 | Projected |
| Cluster 2 | 0.736 | 0.690 | 0.781 | Projected |
| Cluster 2 | 0.744 | 0.697 | 0.790 | Projected |
| Cluster 2 | 0.752 | 0.705 | 0.798 | Projected |
| Cluster 2 | 0.760 | 0.713 | 0.806 | Projected |
| Cluster 2 | 0.768 | 0.721 | 0.814 | Projected |
| Cluster 2 | 0.776 | 0.728 | 0.823 | Projected |
| Cluster 2 | 0.784 | 0.736 | 0.831 | Projected |
| Cluster 2 | 0.791 | 0.744 | 0.839 | Projected |
| Cluster 2 | 0.799 | 0.752 | 0.847 | Projected |
| Cluster 2 | 0.807 | 0.759 | 0.856 | Projected |
| Cluster 2 | 0.815 | 0.767 | 0.864 | Projected |
| Cluster 2 | 0.823 | 0.775 | 0.872 | Projected |
| Cluster 2 | 0.831 | 0.782 | 0.881 | Projected |
| Cluster 2 | 0.839 | 0.790 | 0.889 | Projected |
| Cluster 2 | 0.847 | 0.798 | 0.897 | Projected |
| Cluster 3 | 0.274 | 0.249 | 0.299 | Historical/fitted |
| Cluster 3 | 0.275 | 0.250 | 0.300 | Historical/fitted |
| Cluster 3 | 0.276 | 0.251 | 0.300 | Historical/fitted |
| Cluster 3 | 0.277 | 0.253 | 0.301 | Historical/fitted |
| Cluster 3 | 0.278 | 0.254 | 0.301 | Historical/fitted |
| Cluster 3 | 0.279 | 0.255 | 0.302 | Historical/fitted |
| Cluster 3 | 0.279 | 0.256 | 0.303 | Historical/fitted |
| Cluster 3 | 0.280 | 0.257 | 0.303 | Historical/fitted |
| Cluster 3 | 0.281 | 0.258 | 0.304 | Historical/fitted |
| Cluster 3 | 0.282 | 0.260 | 0.305 | Historical/fitted |
| Cluster 3 | 0.283 | 0.261 | 0.305 | Historical/fitted |
| Cluster 3 | 0.284 | 0.262 | 0.306 | Historical/fitted |
| Cluster 3 | 0.285 | 0.263 | 0.307 | Historical/fitted |
| Cluster 3 | 0.286 | 0.264 | 0.308 | Historical/fitted |
| Cluster 3 | 0.286 | 0.265 | 0.308 | Historical/fitted |
| Cluster 3 | 0.287 | 0.265 | 0.309 | Historical/fitted |
| Cluster 3 | 0.288 | 0.266 | 0.310 | Historical/fitted |
| Cluster 3 | 0.289 | 0.267 | 0.311 | Historical/fitted |
| Cluster 3 | 0.290 | 0.268 | 0.312 | Historical/fitted |
| Cluster 3 | 0.291 | 0.269 | 0.313 | Historical/fitted |
| Cluster 3 | 0.292 | 0.270 | 0.314 | Historical/fitted |
| Cluster 3 | 0.293 | 0.270 | 0.315 | Historical/fitted |
| Cluster 3 | 0.294 | 0.271 | 0.316 | Historical/fitted |
| Cluster 3 | 0.294 | 0.272 | 0.317 | Historical/fitted |
| Cluster 3 | 0.295 | 0.272 | 0.318 | Historical/fitted |
| Cluster 3 | 0.296 | 0.273 | 0.319 | Historical/fitted |
| Cluster 3 | 0.297 | 0.274 | 0.321 | Historical/fitted |
| Cluster 3 | 0.298 | 0.274 | 0.322 | Historical/fitted |
| Cluster 3 | 0.299 | 0.275 | 0.323 | Historical/fitted |
| Cluster 3 | 0.300 | 0.275 | 0.324 | Historical/fitted |
| Cluster 3 | 0.301 | 0.276 | 0.326 | Historical/fitted |
| Cluster 3 | 0.302 | 0.276 | 0.327 | Historical/fitted |
| Cluster 3 | 0.302 | 0.277 | 0.328 | Projected |
| Cluster 3 | 0.303 | 0.277 | 0.329 | Projected |
| Cluster 3 | 0.304 | 0.278 | 0.331 | Projected |
| Cluster 3 | 0.305 | 0.278 | 0.332 | Projected |
| Cluster 3 | 0.306 | 0.279 | 0.333 | Projected |
| Cluster 3 | 0.307 | 0.279 | 0.335 | Projected |
| Cluster 3 | 0.308 | 0.279 | 0.336 | Projected |
| Cluster 3 | 0.309 | 0.280 | 0.338 | Projected |
| Cluster 3 | 0.310 | 0.280 | 0.339 | Projected |
| Cluster 3 | 0.310 | 0.280 | 0.340 | Projected |
| Cluster 3 | 0.311 | 0.281 | 0.342 | Projected |
| Cluster 3 | 0.312 | 0.281 | 0.343 | Projected |
| Cluster 3 | 0.313 | 0.281 | 0.345 | Projected |
| Cluster 3 | 0.314 | 0.282 | 0.346 | Projected |
| Cluster 3 | 0.315 | 0.282 | 0.348 | Projected |
| Cluster 3 | 0.316 | 0.282 | 0.349 | Projected |
| Cluster 3 | 0.317 | 0.283 | 0.351 | Projected |
| Cluster 3 | 0.318 | 0.283 | 0.352 | Projected |
| Cluster 3 | 0.318 | 0.283 | 0.354 | Projected |
| Cluster 3 | 0.319 | 0.283 | 0.355 | Projected |
| Cluster 3 | 0.320 | 0.284 | 0.357 | Projected |
| Cluster 3 | 0.321 | 0.284 | 0.358 | Projected |
| Cluster 3 | 0.322 | 0.284 | 0.360 | Projected |
| Cluster 3 | 0.323 | 0.284 | 0.361 | Projected |
| Cluster 3 | 0.324 | 0.284 | 0.363 | Projected |
| Cluster 3 | 0.325 | 0.285 | 0.365 | Projected |
| Cluster 3 | 0.326 | 0.285 | 0.366 | Projected |
| Cluster 3 | 0.326 | 0.285 | 0.368 | Projected |
| Cluster 3 | 0.327 | 0.285 | 0.369 | Projected |
| Cluster 4 | 0.154 | 0.080 | 0.228 | Historical/fitted |
| Cluster 4 | 0.162 | 0.088 | 0.236 | Historical/fitted |
| Cluster 4 | 0.170 | 0.096 | 0.244 | Historical/fitted |
| Cluster 4 | 0.178 | 0.105 | 0.252 | Historical/fitted |
| Cluster 4 | 0.187 | 0.113 | 0.260 | Historical/fitted |
| Cluster 4 | 0.195 | 0.121 | 0.268 | Historical/fitted |
| Cluster 4 | 0.203 | 0.130 | 0.276 | Historical/fitted |
| Cluster 4 | 0.211 | 0.138 | 0.284 | Historical/fitted |
| Cluster 4 | 0.219 | 0.146 | 0.292 | Historical/fitted |
| Cluster 4 | 0.227 | 0.155 | 0.300 | Historical/fitted |
| Cluster 4 | 0.236 | 0.163 | 0.308 | Historical/fitted |
| Cluster 4 | 0.244 | 0.171 | 0.316 | Historical/fitted |
| Cluster 4 | 0.252 | 0.179 | 0.324 | Historical/fitted |
| Cluster 4 | 0.260 | 0.187 | 0.333 | Historical/fitted |
| Cluster 4 | 0.268 | 0.196 | 0.341 | Historical/fitted |
| Cluster 4 | 0.276 | 0.204 | 0.349 | Historical/fitted |
| Cluster 4 | 0.284 | 0.212 | 0.357 | Historical/fitted |
| Cluster 4 | 0.293 | 0.220 | 0.365 | Historical/fitted |
| Cluster 4 | 0.301 | 0.228 | 0.373 | Historical/fitted |
| Cluster 4 | 0.309 | 0.236 | 0.382 | Historical/fitted |
| Cluster 4 | 0.317 | 0.244 | 0.390 | Historical/fitted |
| Cluster 4 | 0.325 | 0.252 | 0.398 | Historical/fitted |
| Cluster 4 | 0.333 | 0.261 | 0.406 | Historical/fitted |
| Cluster 4 | 0.342 | 0.269 | 0.414 | Historical/fitted |
| Cluster 4 | 0.350 | 0.277 | 0.423 | Historical/fitted |
| Cluster 4 | 0.358 | 0.285 | 0.431 | Historical/fitted |
| Cluster 4 | 0.366 | 0.293 | 0.439 | Historical/fitted |
| Cluster 4 | 0.374 | 0.301 | 0.448 | Historical/fitted |
| Cluster 4 | 0.382 | 0.309 | 0.456 | Historical/fitted |
| Cluster 4 | 0.390 | 0.317 | 0.464 | Historical/fitted |
| Cluster 4 | 0.399 | 0.325 | 0.473 | Historical/fitted |
| Cluster 4 | 0.407 | 0.333 | 0.481 | Historical/fitted |
| Cluster 4 | 0.415 | 0.340 | 0.489 | Projected |
| Cluster 4 | 0.423 | 0.348 | 0.498 | Projected |
| Cluster 4 | 0.431 | 0.356 | 0.506 | Projected |
| Cluster 4 | 0.439 | 0.364 | 0.515 | Projected |
| Cluster 4 | 0.448 | 0.372 | 0.523 | Projected |
| Cluster 4 | 0.456 | 0.380 | 0.531 | Projected |
| Cluster 4 | 0.464 | 0.388 | 0.540 | Projected |
| Cluster 4 | 0.472 | 0.396 | 0.548 | Projected |
| Cluster 4 | 0.480 | 0.403 | 0.557 | Projected |
| Cluster 4 | 0.488 | 0.411 | 0.565 | Projected |
| Cluster 4 | 0.496 | 0.419 | 0.574 | Projected |
| Cluster 4 | 0.505 | 0.427 | 0.582 | Projected |
| Cluster 4 | 0.513 | 0.435 | 0.591 | Projected |
| Cluster 4 | 0.521 | 0.442 | 0.599 | Projected |
| Cluster 4 | 0.529 | 0.450 | 0.608 | Projected |
| Cluster 4 | 0.537 | 0.458 | 0.617 | Projected |
| Cluster 4 | 0.545 | 0.466 | 0.625 | Projected |
| Cluster 4 | 0.554 | 0.473 | 0.634 | Projected |
| Cluster 4 | 0.562 | 0.481 | 0.642 | Projected |
| Cluster 4 | 0.570 | 0.489 | 0.651 | Projected |
| Cluster 4 | 0.578 | 0.496 | 0.660 | Projected |
| Cluster 4 | 0.586 | 0.504 | 0.668 | Projected |
| Cluster 4 | 0.594 | 0.512 | 0.677 | Projected |
| Cluster 4 | 0.602 | 0.520 | 0.685 | Projected |
| Cluster 4 | 0.611 | 0.527 | 0.694 | Projected |
| Cluster 4 | 0.619 | 0.535 | 0.703 | Projected |
| Cluster 4 | 0.627 | 0.542 | 0.711 | Projected |
| Cluster 4 | 0.635 | 0.550 | 0.720 | Projected |
| Cluster 4 | 0.643 | 0.558 | 0.729 | Projected |

# Trajectory estimates are Bayesian INLA fitted/projection values. Intervals are posterior credible intervals. Supplementary Figure

# **Supplementary Figure 1. Schematic illustration of the relative driver structure ratio (RDSR).**

#
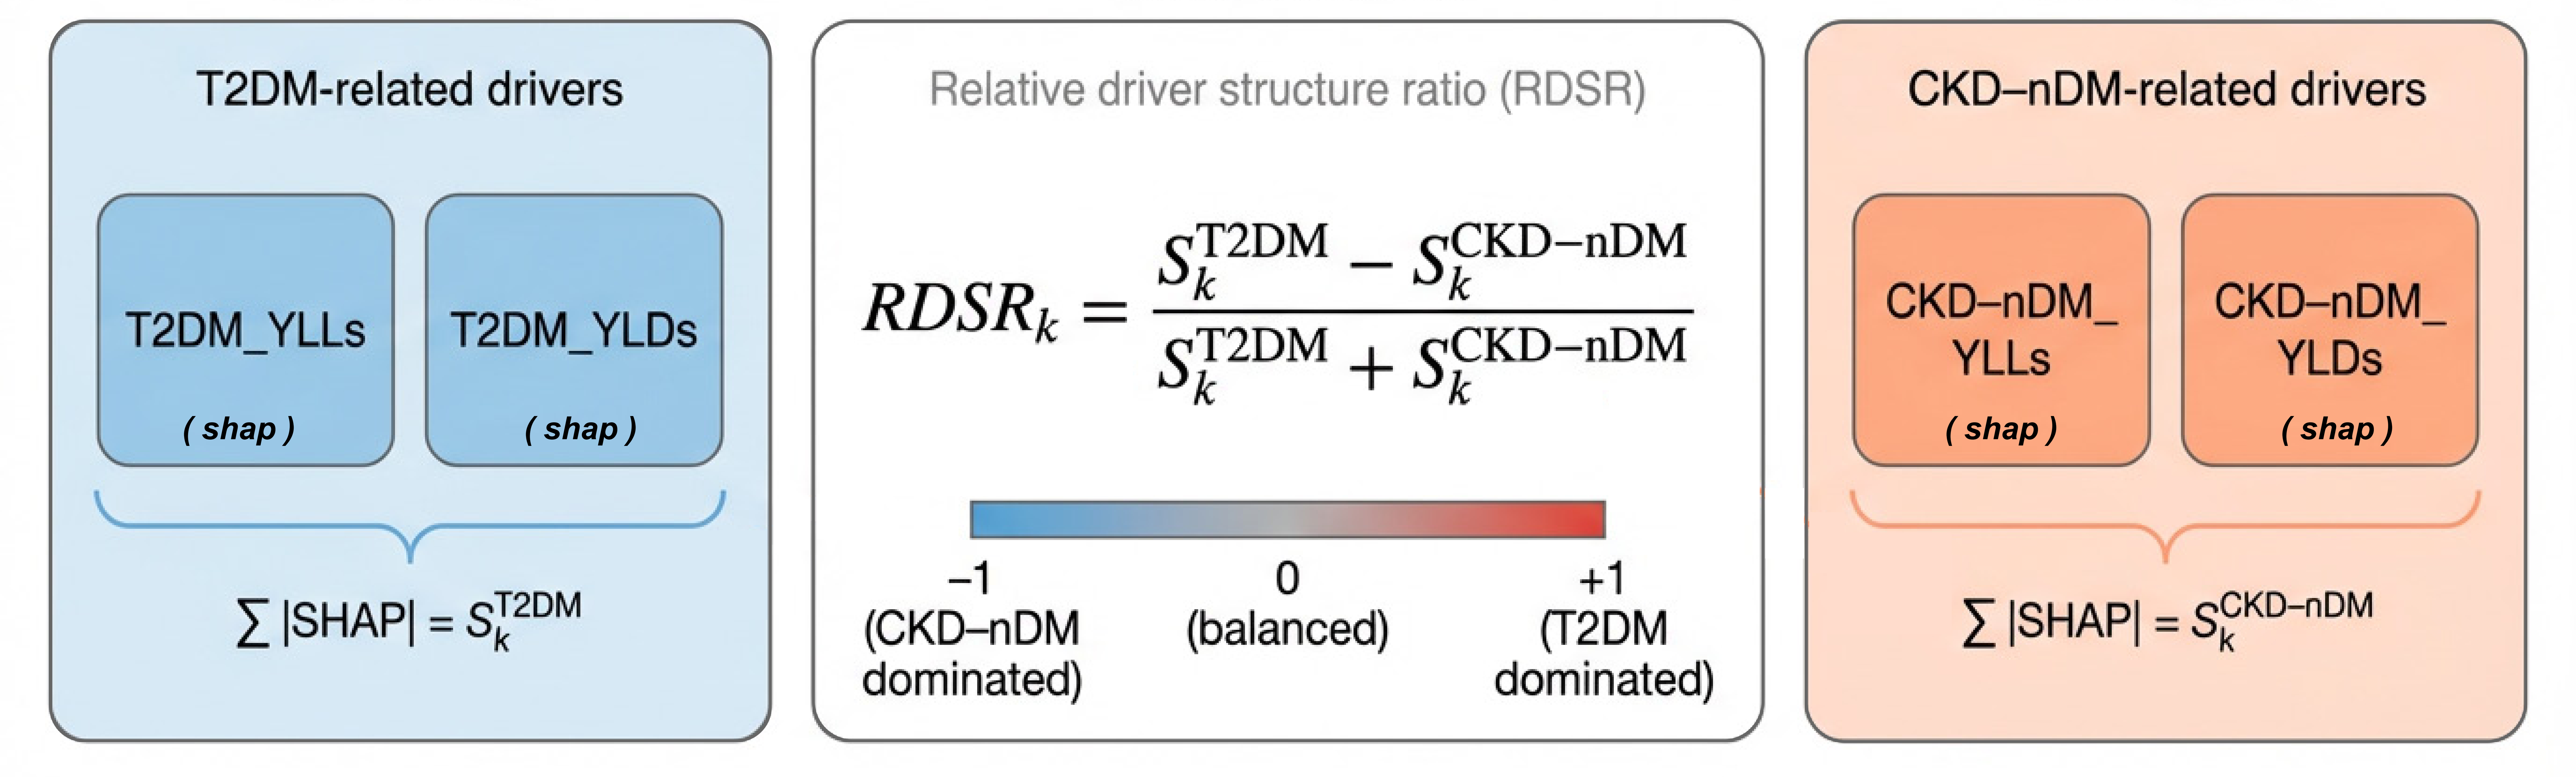


The schematic shows how the RDSR is derived from the summed absolute TreeSHAP contributions of T2DM_YLLs and T2DM_YLDs versus CKD–nDM_YLLs and CKD–nDM_YLDs; the color bar indicates the range from –1 (CKD–nDM dominated) to +1 (T2DM dominated). RDSR = relative driver structure ratio; T2DM = type 2 diabetes mellitus; CKD–nDM = chronic kidney disease not attributed to diabetes mellitus; YLLs = years of life lost; YLDs = years lived with disability.

#
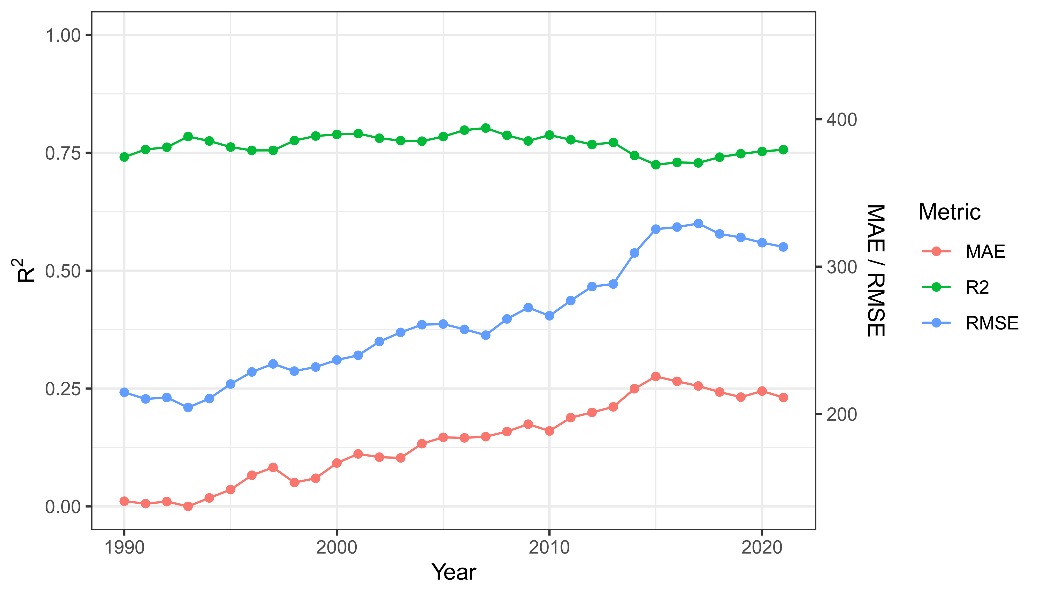
Supplementary Figure 2. Yearly cross-validated model performance based on retrained annual models

For each calendar year from 1990 to 2021, XGBoost models were retrained and evaluated using five-fold cross-validation. The left y-axis shows the coefficient of determination (R²), and the right y-axis shows mean absolute error (MAE) and root mean squared error (RMSE). Across 1990–2021, yearly R² had a median of 0.77 (range 0.72–0.80), MAE had a median of 184.0 (range 137.3–225.5), and RMSE had a median of 259.1 (range 204.4–329.3). This analysis supports the temporal stability of within-year model performance


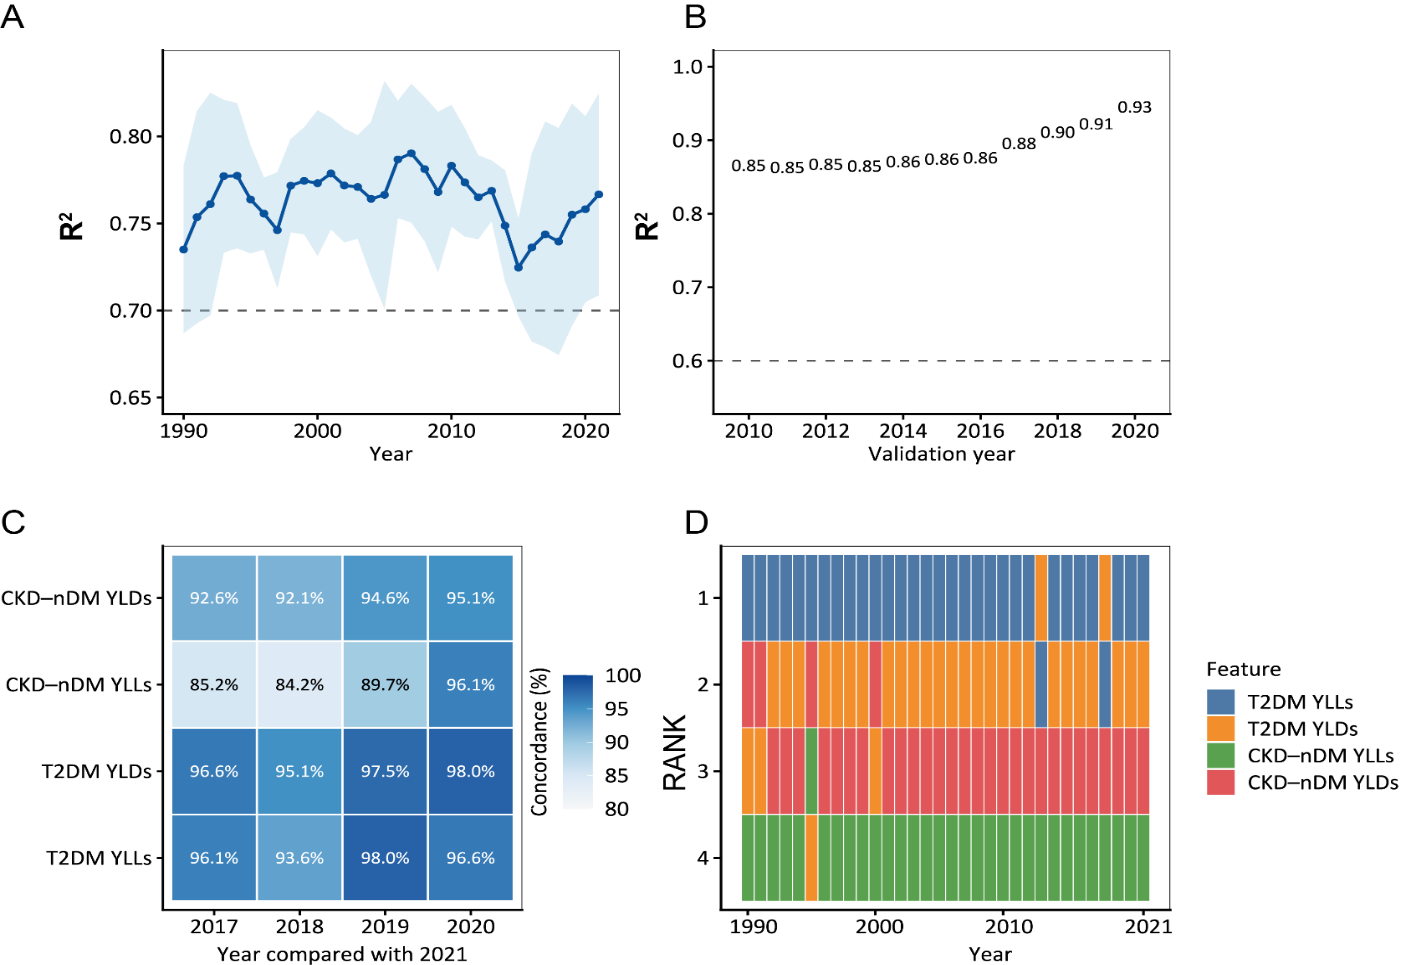
Supplementary Figure 3**. Model validation and SHAP attribution stability.**

a, Year-wise five-fold cross-validation R² for the XGBoost model from 1990 to 2021. The shaded band indicates variability across folds, and the dashed line marks the prespecified R² threshold of 0.70. b, Temporal validation R² when the 2021-trained model was applied to 2010–2020 without retraining; the dashed line marks the prespecified threshold of 0.60. c, SHAP sign concordance between 2017–2020 and 2021 across retained features. d, Year-wise ranking of features by mean absolute SHAP contribution. These panels summarise model performance and feature-attribution stability rather than causal effects.

.

## **Supplementary Figure 4. Global Burden of Disease vs. Socio-demographic Development**


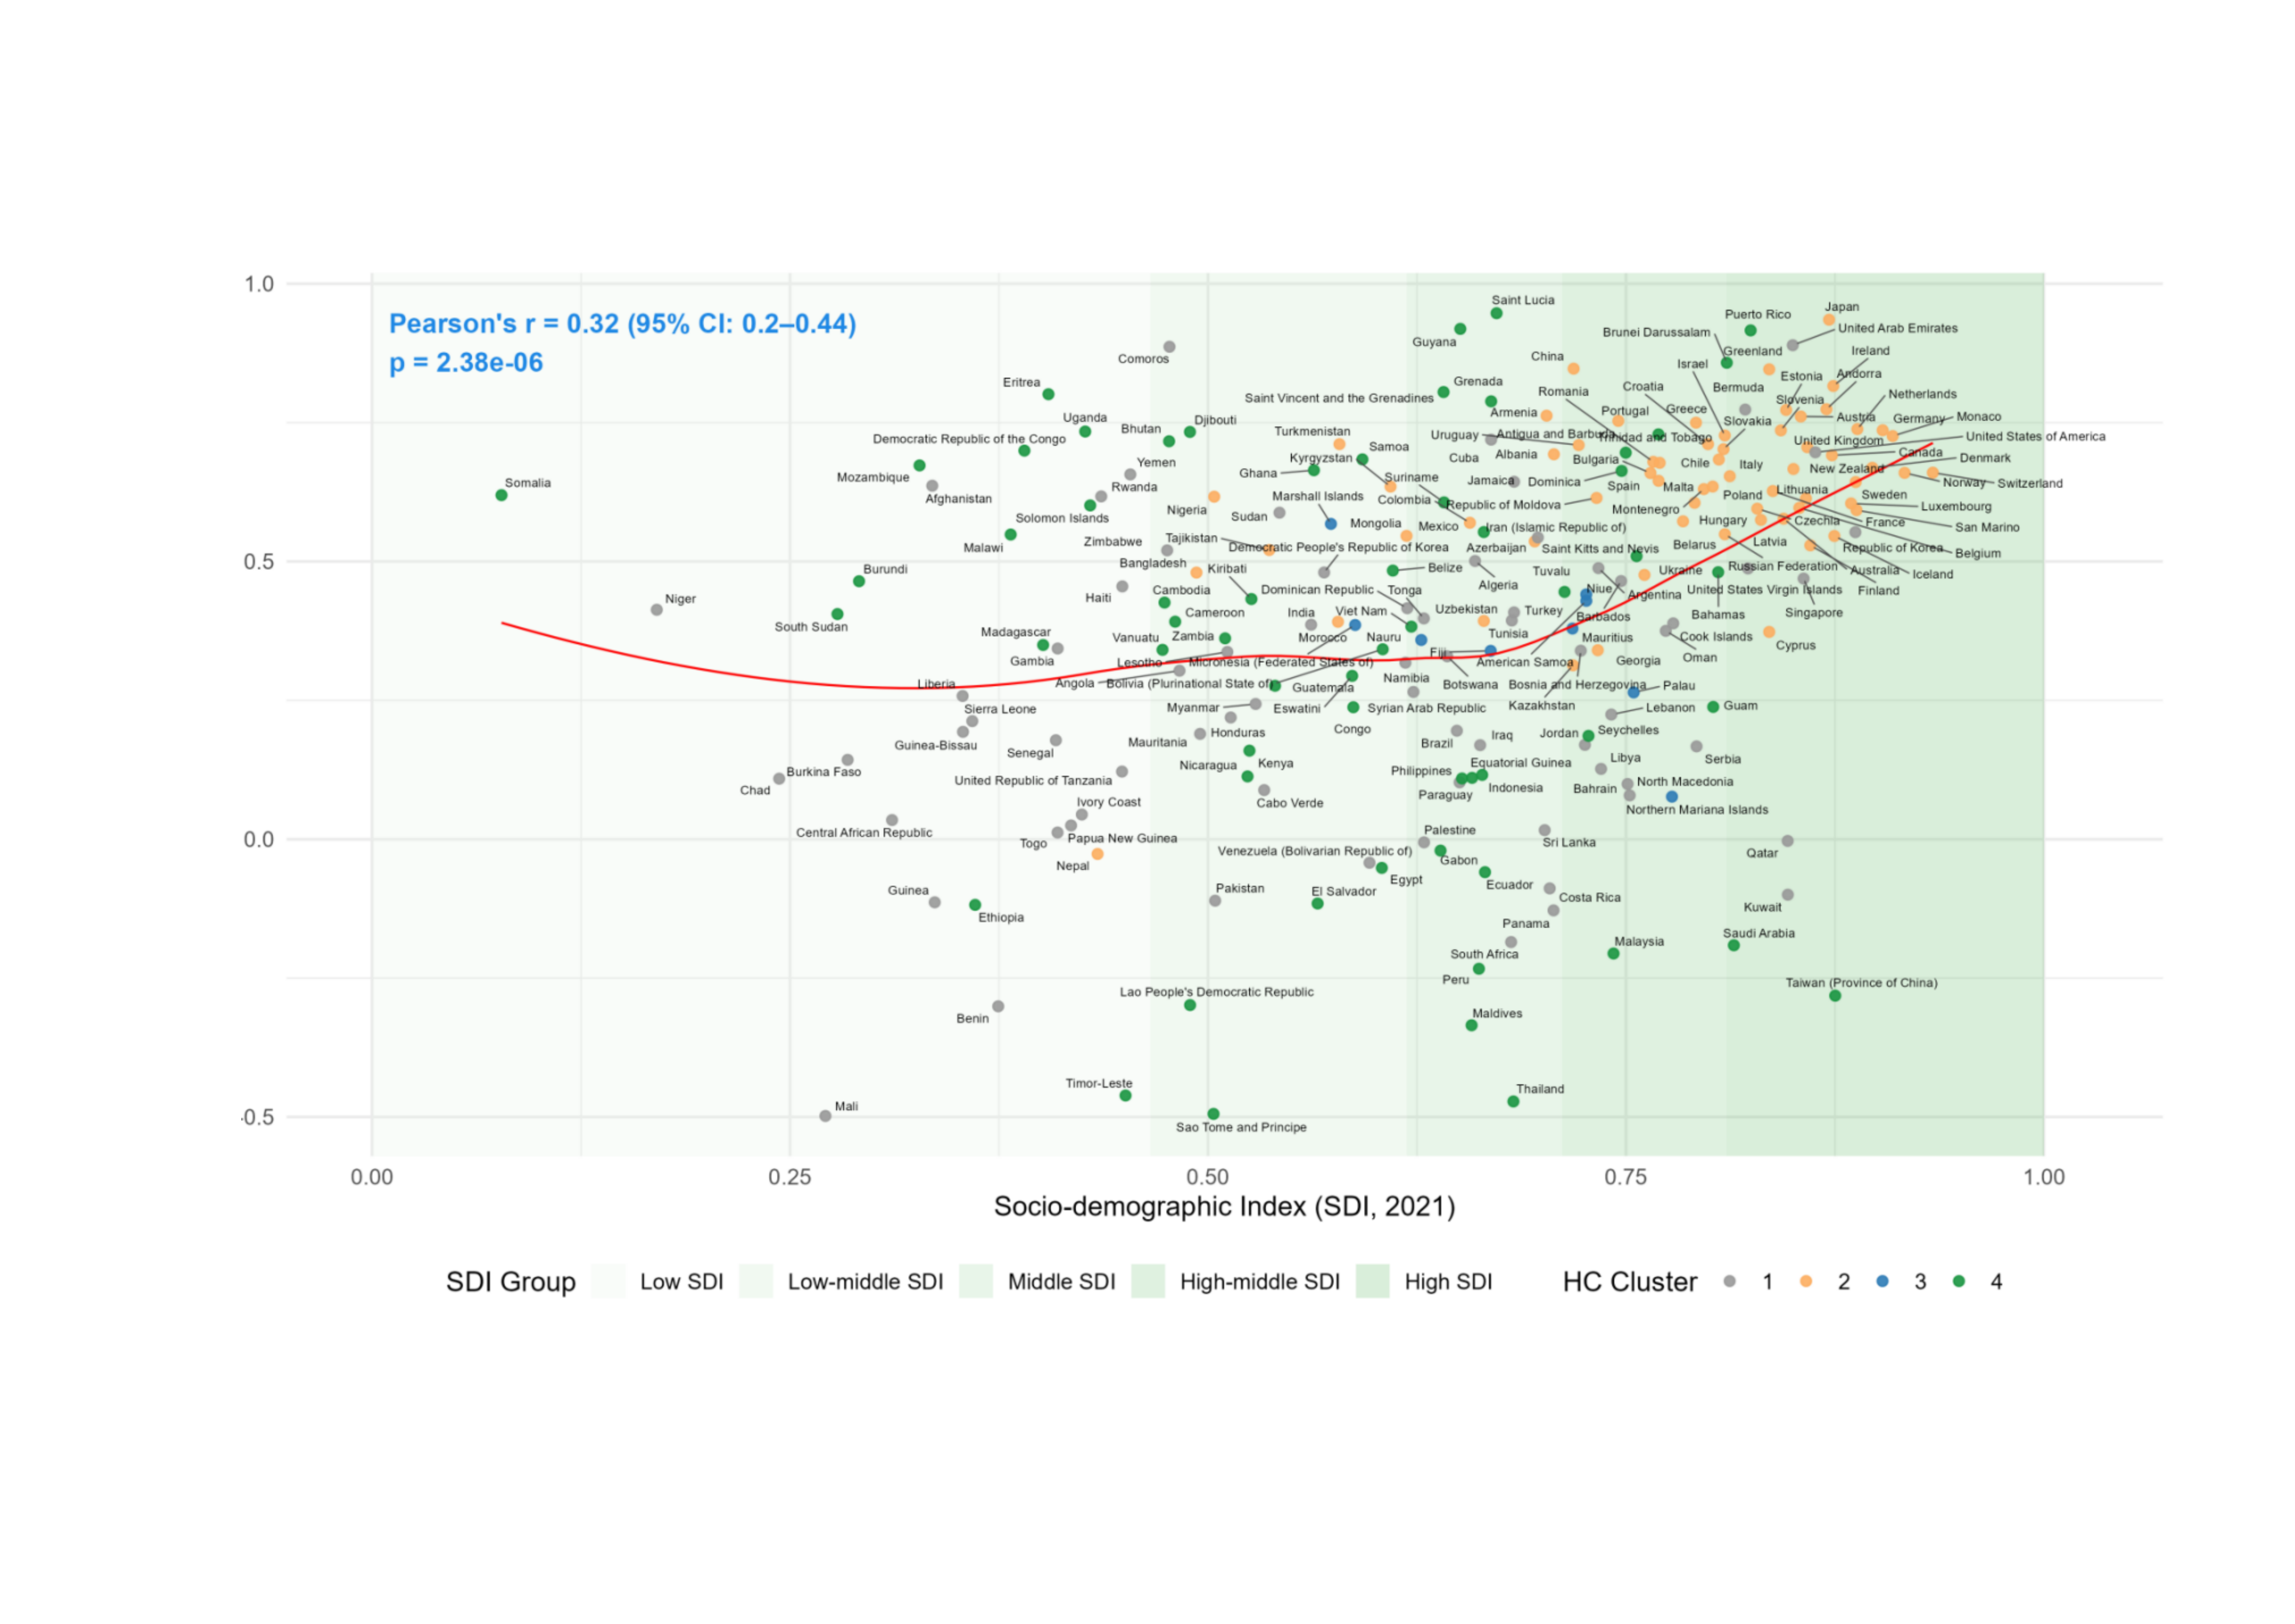


The y-axis shows the RDSR value. RDSR=Relative Difference in SHAP Ratio. CKD–T2DM=Chronic kidney disease due to type 2 diabetes mellitus.

## **Supplementary Figure 5. Normality assessment of standardized residuals**


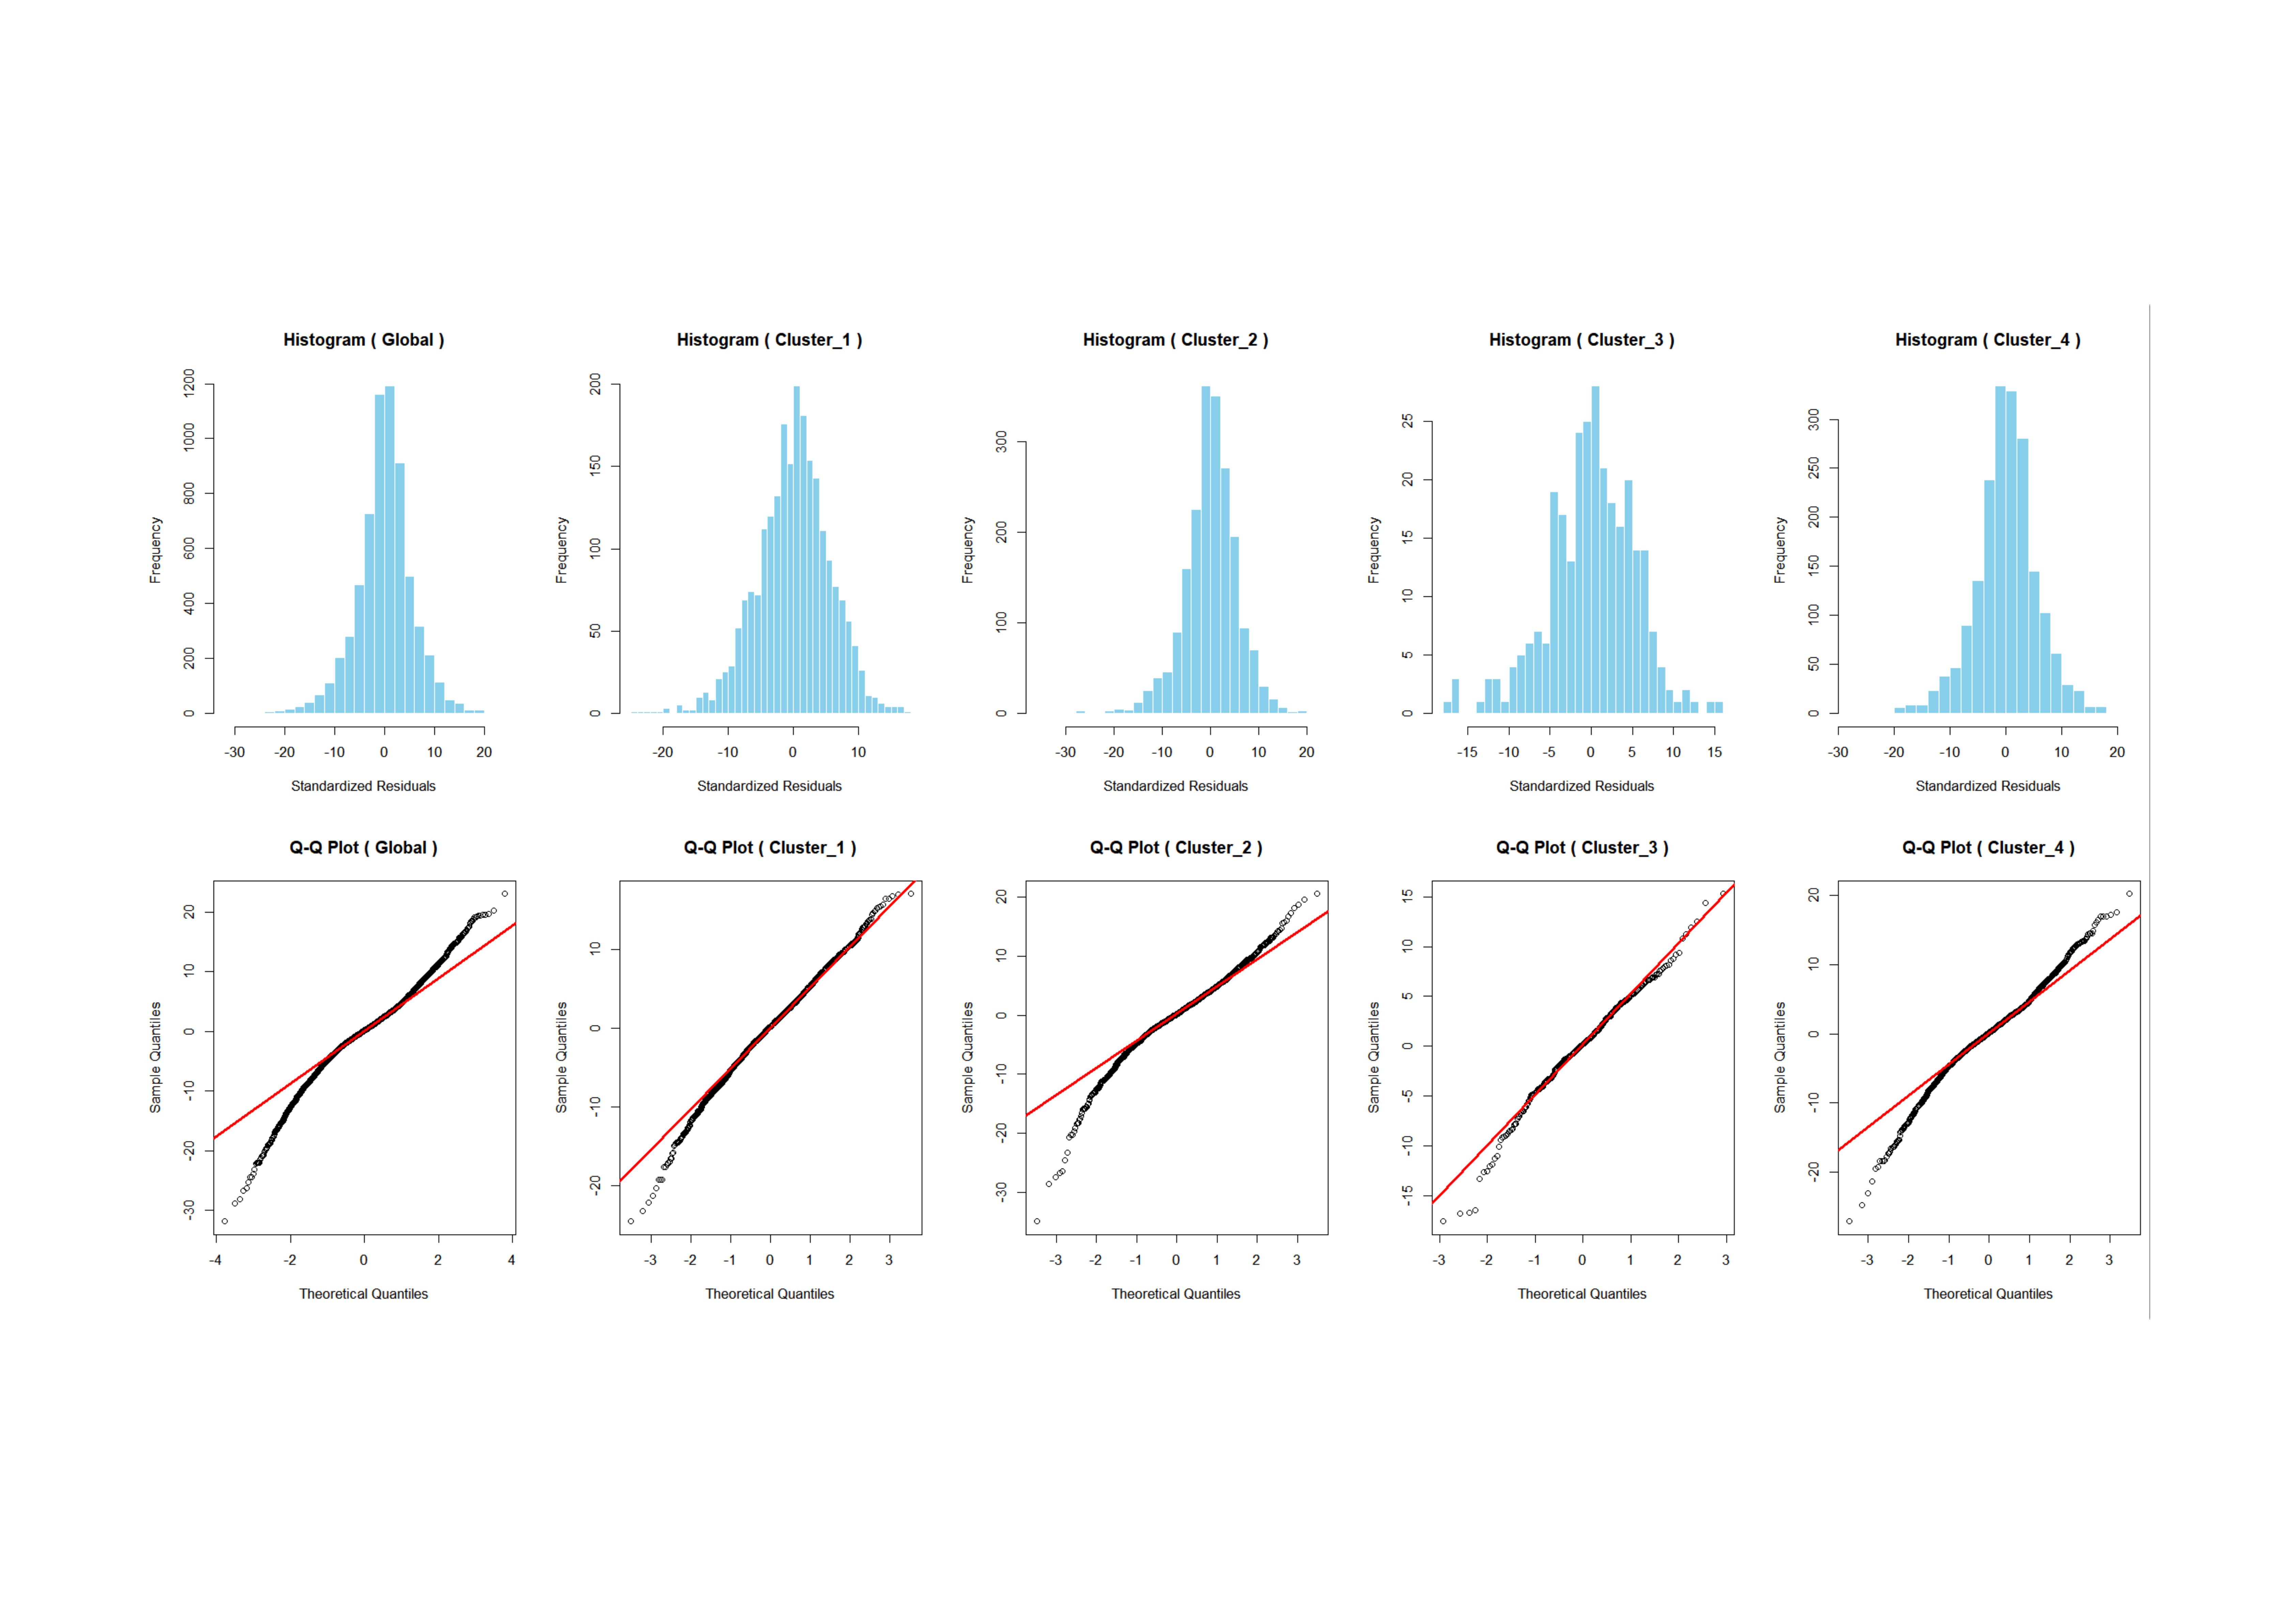


Histograms (top row) and Q-Q plots (bottom row) of standardized residuals for the Global model and four clusters


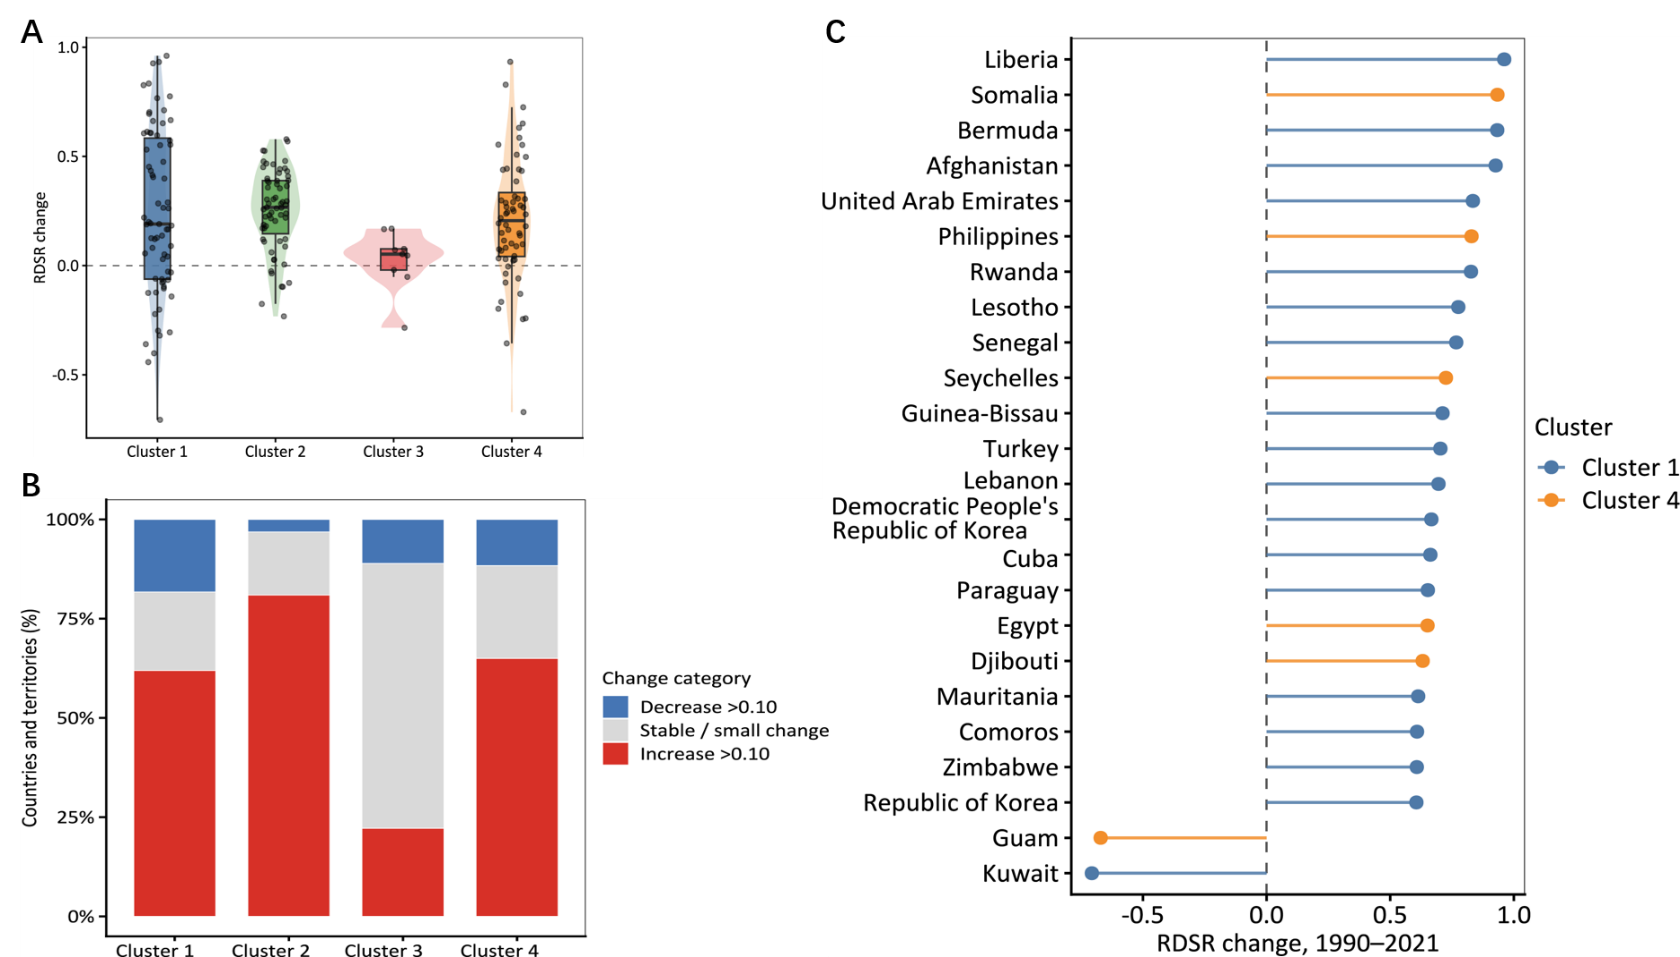
Supplementary Figure 6. **Country-level changes in RDSR from 1990 to 2021 across SHAP-derived clusters.**

**a,** Distribution of country-level changes in the relative driver structure ratio (RDSR) between 1990 and 2021, stratified by SHAP-derived burden-structure cluster. Violin plots show the distribution within each cluster, box plots show the median and interquartile range, and points represent individual countries or territories. **b,** Proportion of countries and territories within each cluster showing an increase greater than 0.10, decrease greater than 0.10, or stable/small change in RDSR from 1990 to 2021. **c,** Countries and territories with the largest absolute RDSR changes over the same period. Positive values indicate a shift toward greater T2DM-related model-attributed contribution, whereas negative values indicate a shift toward greater CKD–nDM-related model-attributed contribution. These changes describe temporal variation in model-attributed burden structure and should not be interpreted as causal effects.

Supplementary Figure 7. Projected RDSR trajectories under ±10% SHAP perturbations


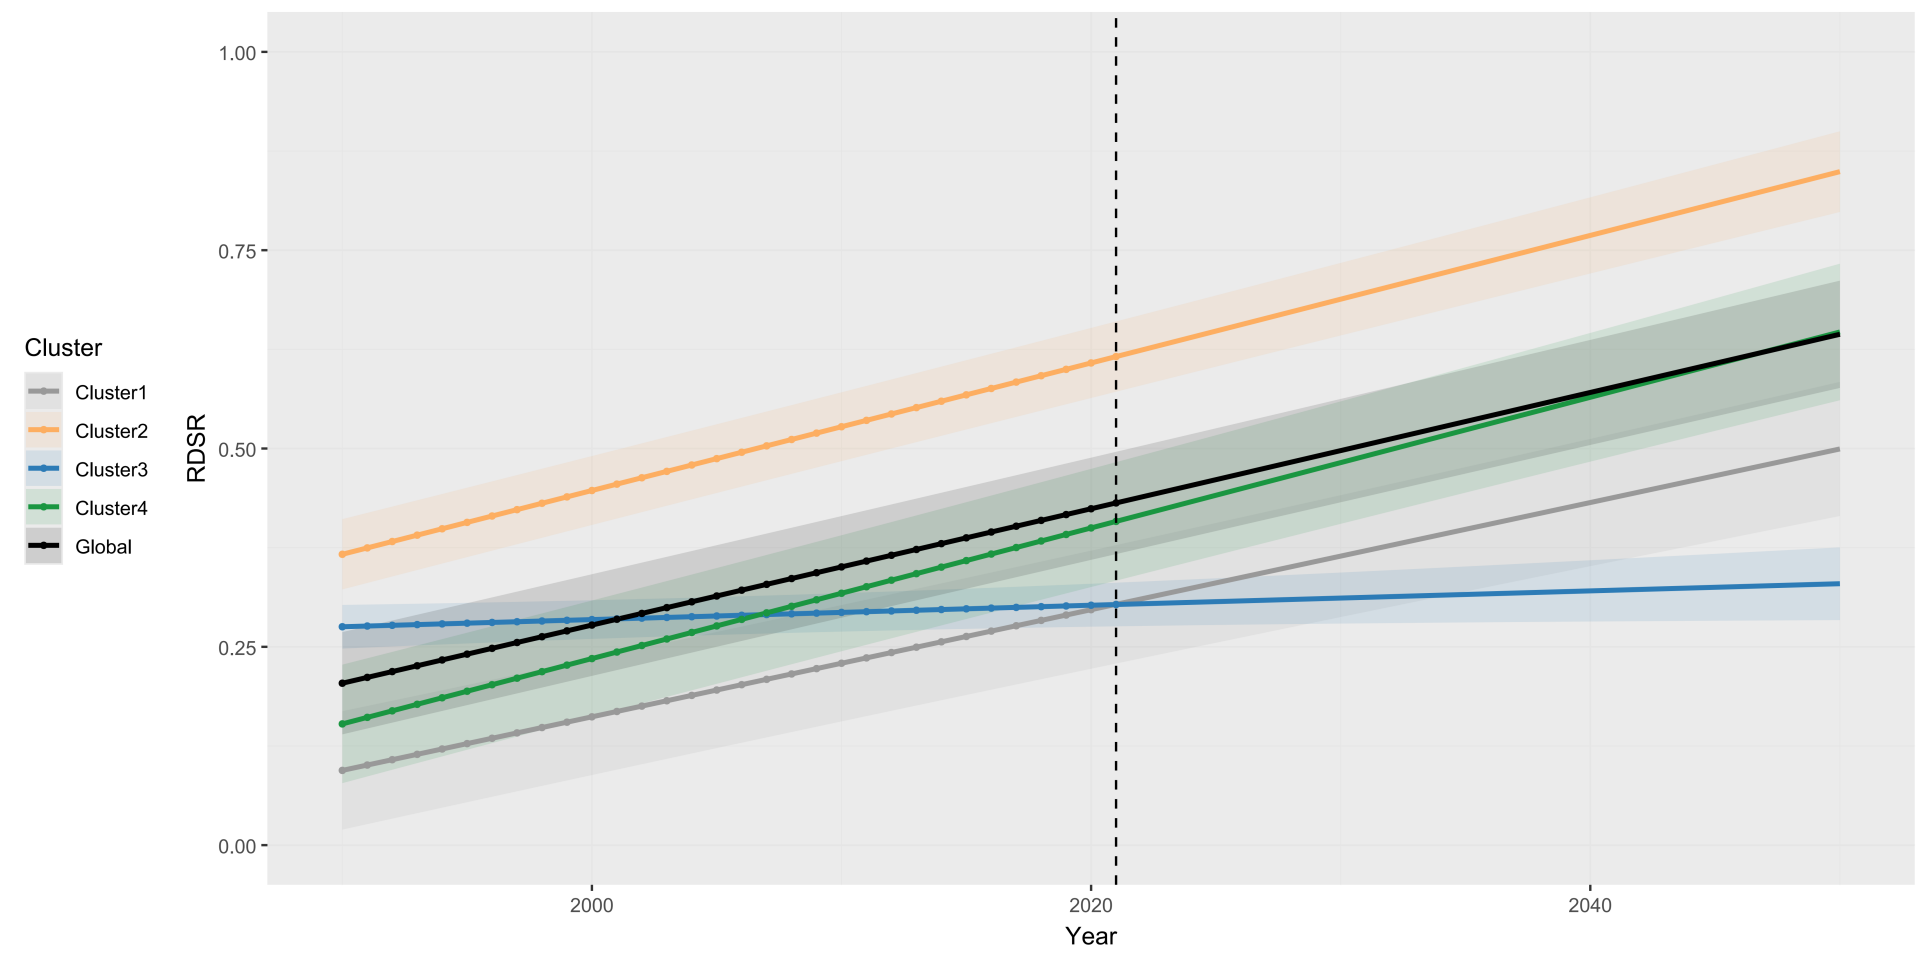

Projected relative disease-specific risk (RDSR) for CKD–T2DM under a sensitivity scenario in which each SHAP value was randomly perturbed within ±10% of its original magnitude. Solid lines show mean trajectories and shaded areas show 95% uncertainty intervals for the Global model and four clusters over 1990–2050. The vertical dashed line marks the final year of observed data (2021), after which values are extrapolated forecasts.
